# Supplementary material for: MicroRNAs and targets in senescent litchi fruit during ambient storage and post-cold storage shelf life
Source: PubMed Central journal article supplement (PMC4504174; doi:10.1186/s12870-015-0509-2), 2015-07-16

Figure S1. Predicted secondary stem-loop structures of the litchi-specific miRNAs.

Name: lch-miRC1

Sequence: TGGGTGAAAGATGCAGCAAAATCT

Normalized abundance: 414.24

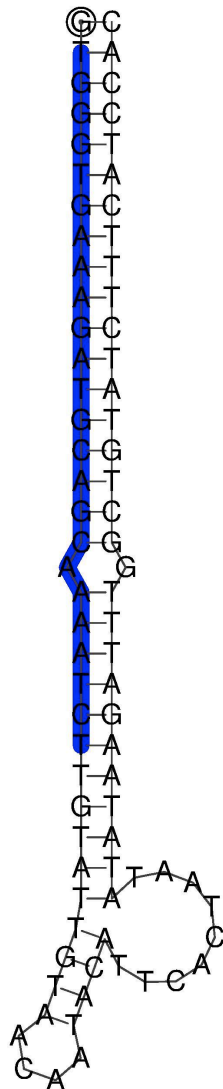

Name: lch-miRC2

Sequence: TTCGATTTCGAACCCAGAGATGTCT

Normalized abundance: 216.73

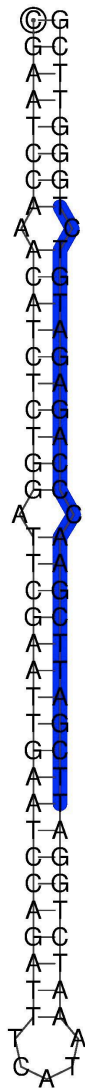

Name: lch-miRC3

Sequence: TTGTGGTGCTATTGTTTCTCCTCT

Normalized abundance: 115.11

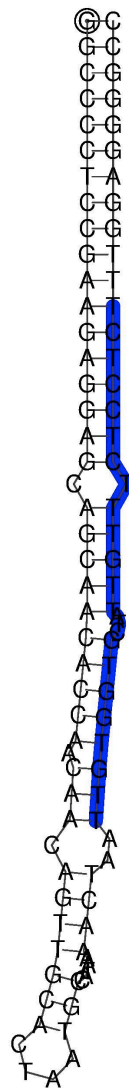

Name: lch-miRC4

Sequence: TTCAAGACAACAACACTATTGGCTCT

Normalized abundance: 270.65

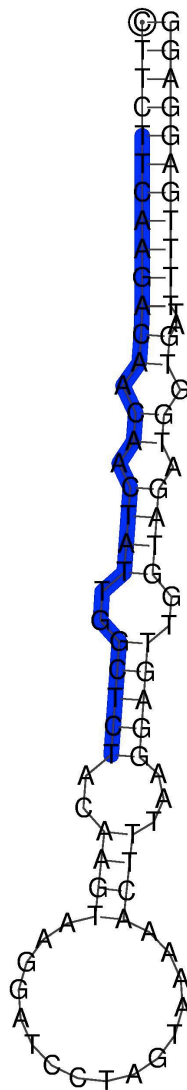

Name: lch-miRC5

Sequence: CCTGTTGAGCTTGACTCTAGTCT

Normalized abundance: 66.62

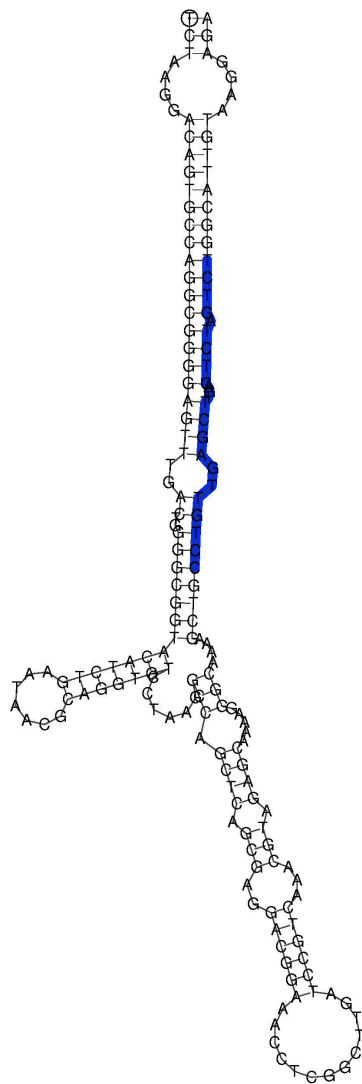

Name: lch-miRC6

Sequence: CGAAAAGAACTCTGACTGGTCT

Normalized abundance: 107.62

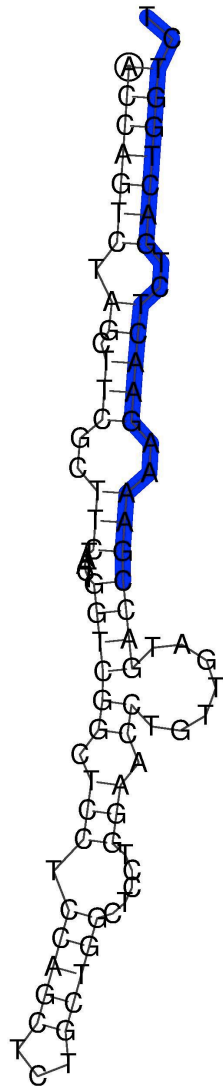

Name: lch-miRC7

Sequence: ATTTGGTAGTAGCTGAGATTCTCT

Normalized abundance: 46.58

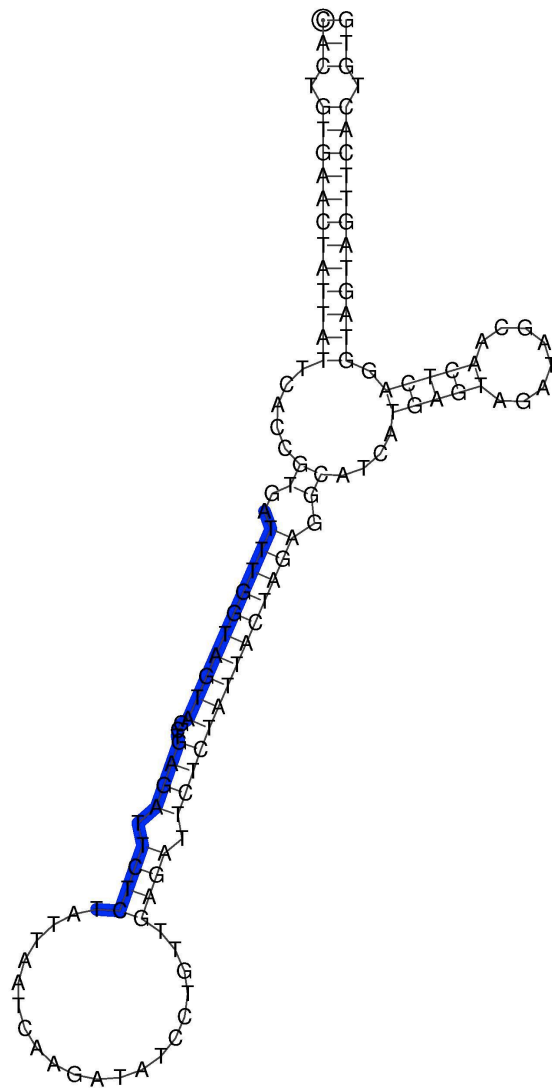

Name: lch-miRC8

Sequence: CTATCAAACGATGATTGTTGGTCT

Normalized abundance: 23.58

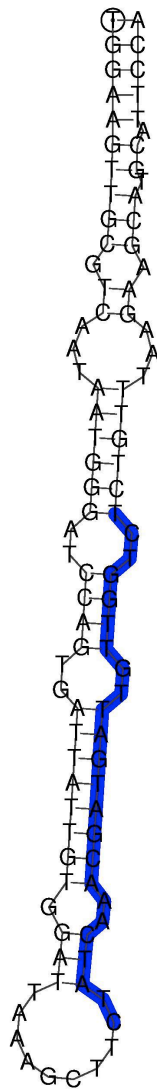



Name: lch-miRC9

Sequence: ATTAAAGGAAGAAAAGGACCTCT

Normalized abundance: 19.18

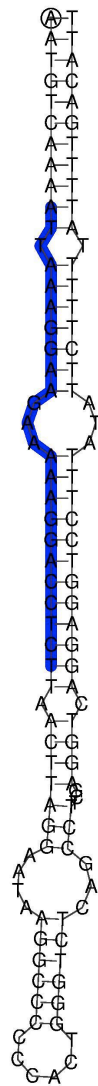

Name: lch-miRC10

Sequence: TGTTGAGCTTGACTCTAGTCT

Normalized abundance: 38.60

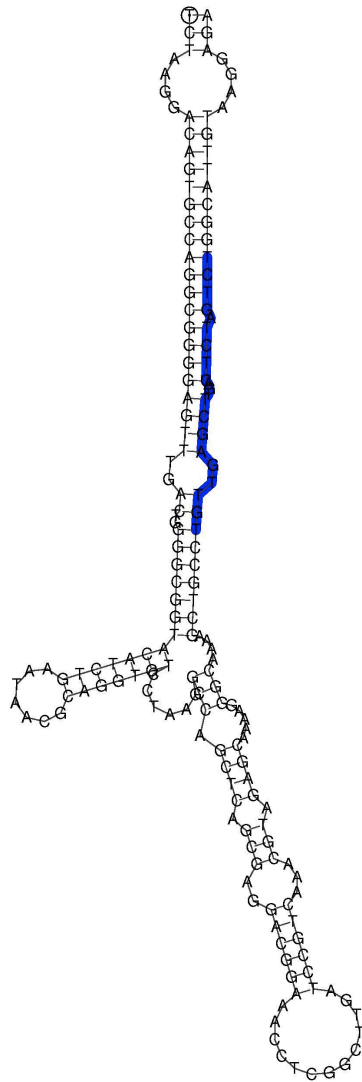

Name: lch-miRC11

Sequence: CGGAGAAGGGCAATTACTCATTCT

Normalized abundance: 7.87

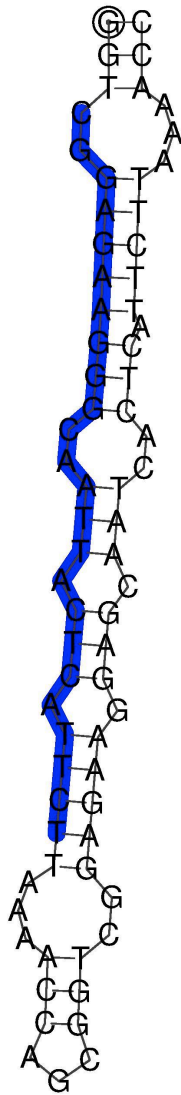

Supplement: 12870_2015_509_MOESM4_ESM.pdf [file 12870_2015_509_MOESM4_ESM.pdf]
