# Supplementary material for: MicroRNAs and targets in senescent litchi fruit during ambient storage and post-cold storage shelf life
Source: PubMed Central journal article supplement (PMC4504174; doi:10.1186/s12870-015-0509-2), 2015-07-16

9\_miR159\_1692\_lychee\_43435

target 5' AGUGAAGUUGGGAGCUCCCUuCACUCCAAUACCCAGAAAC 3'

. . . . . : : : : :

query 3' UCUCGAGGGAAGUUAGGUUU 5'

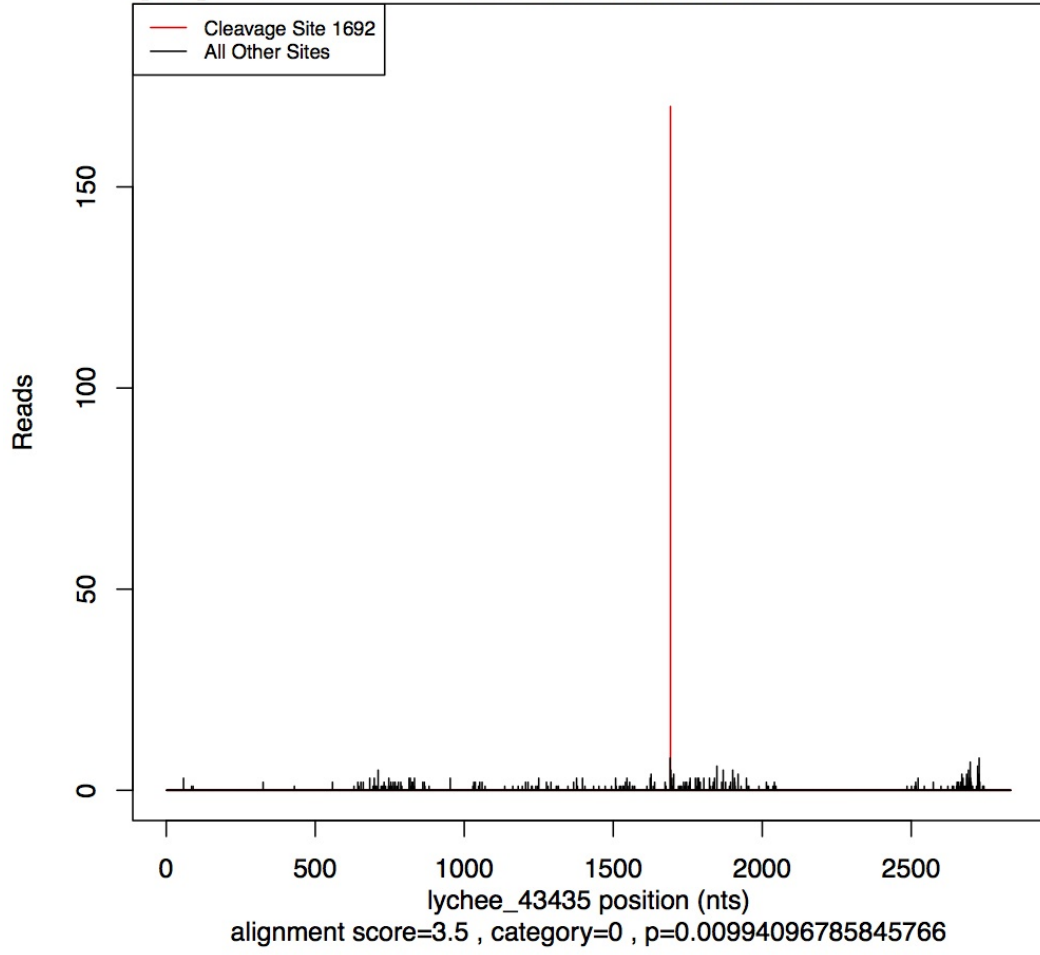

16\_miR159\_1692\_lychee\_43435

target 5' AGUGAAGUUGGGAGCUCUUuCACUCCAAUACCCAGAAAC 3'

. . . . . : : : : :

query 3' UCUUGAGGGAAGUUAGGUUU 5'

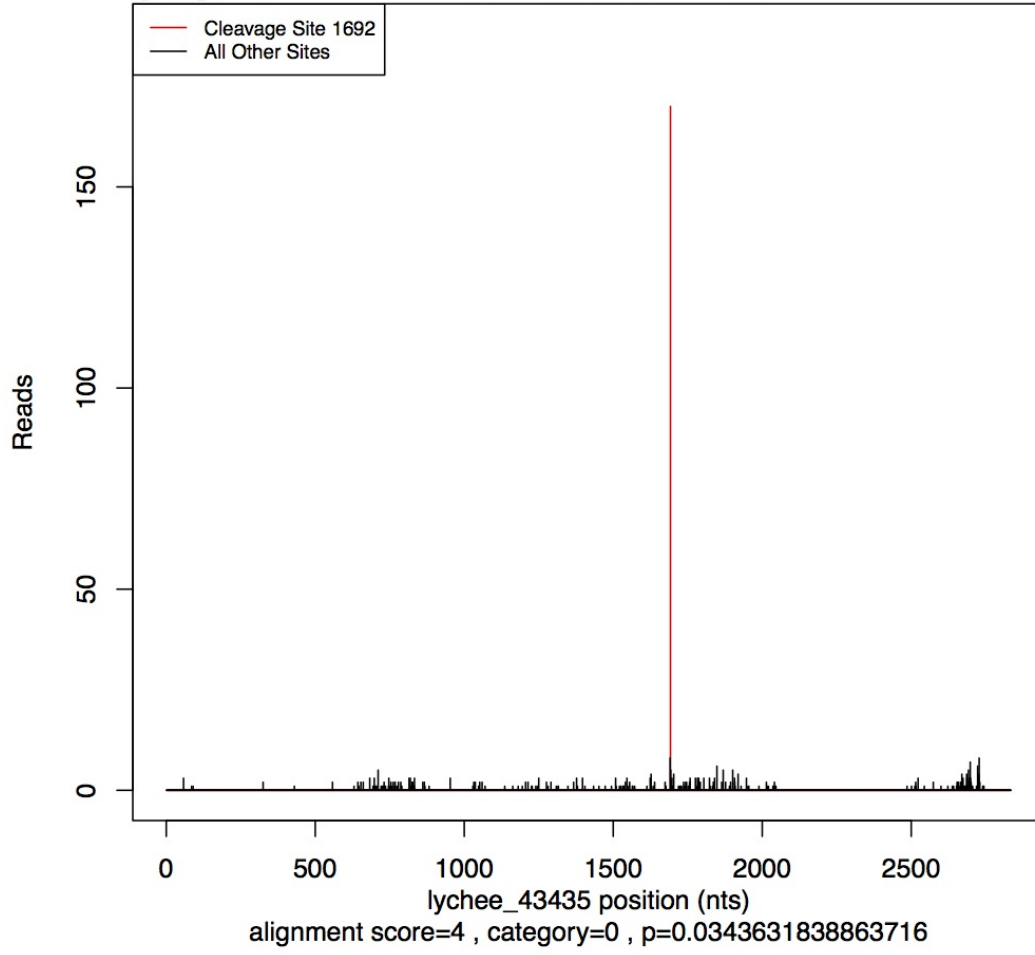

20\_miR159\_1692\_lychee\_43435

target 5' GUGAAGUUGGGAGCUCCCUuCACUCCAAUACCCAGAAAC 3'

. . . . . : : : : :

query 3' UUCGAGGGAAGUUAGGUUU 5'

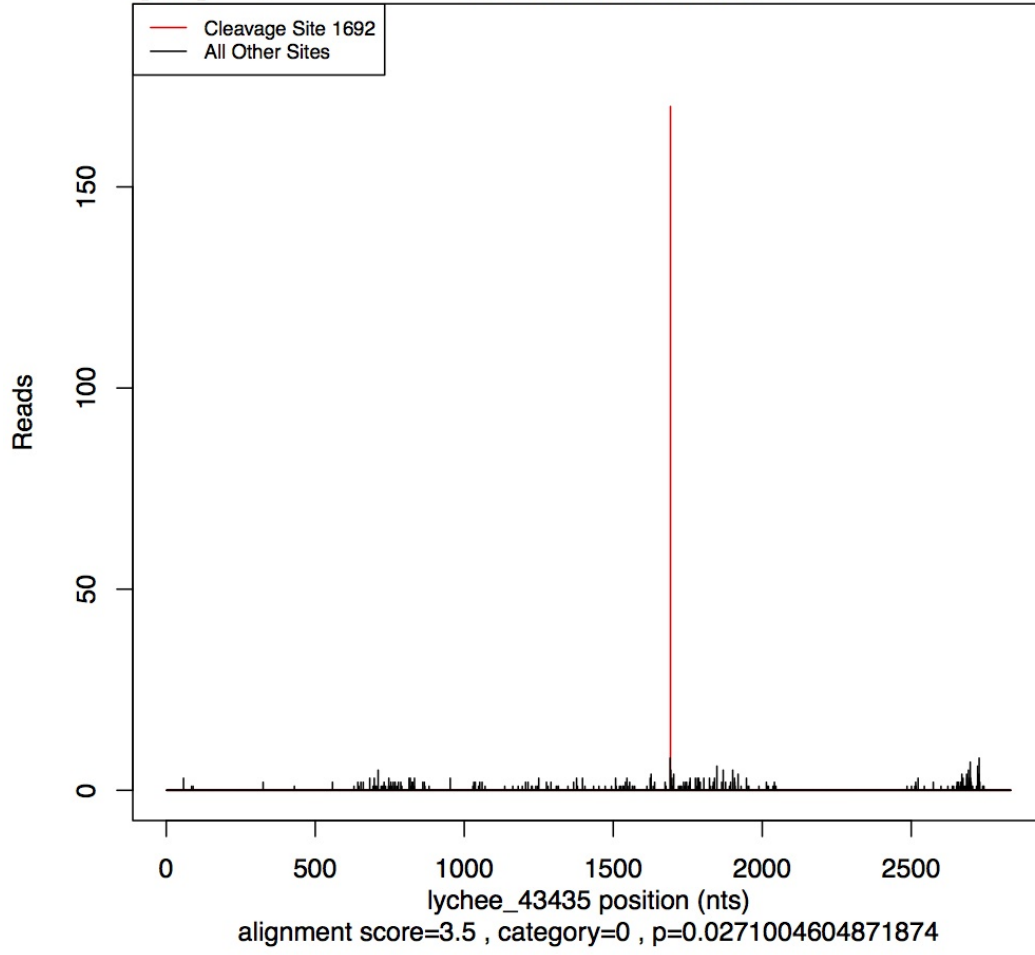



26\_miR159\_1692\_lychee\_43435

target 5' AGUGAAGUUGGGAGCUCUCCUuCACUCCAAUACCCAGAAAC 3'

query 3' ..... : .....  
UCUCGAGGGAAGUUAGGUUA 5'

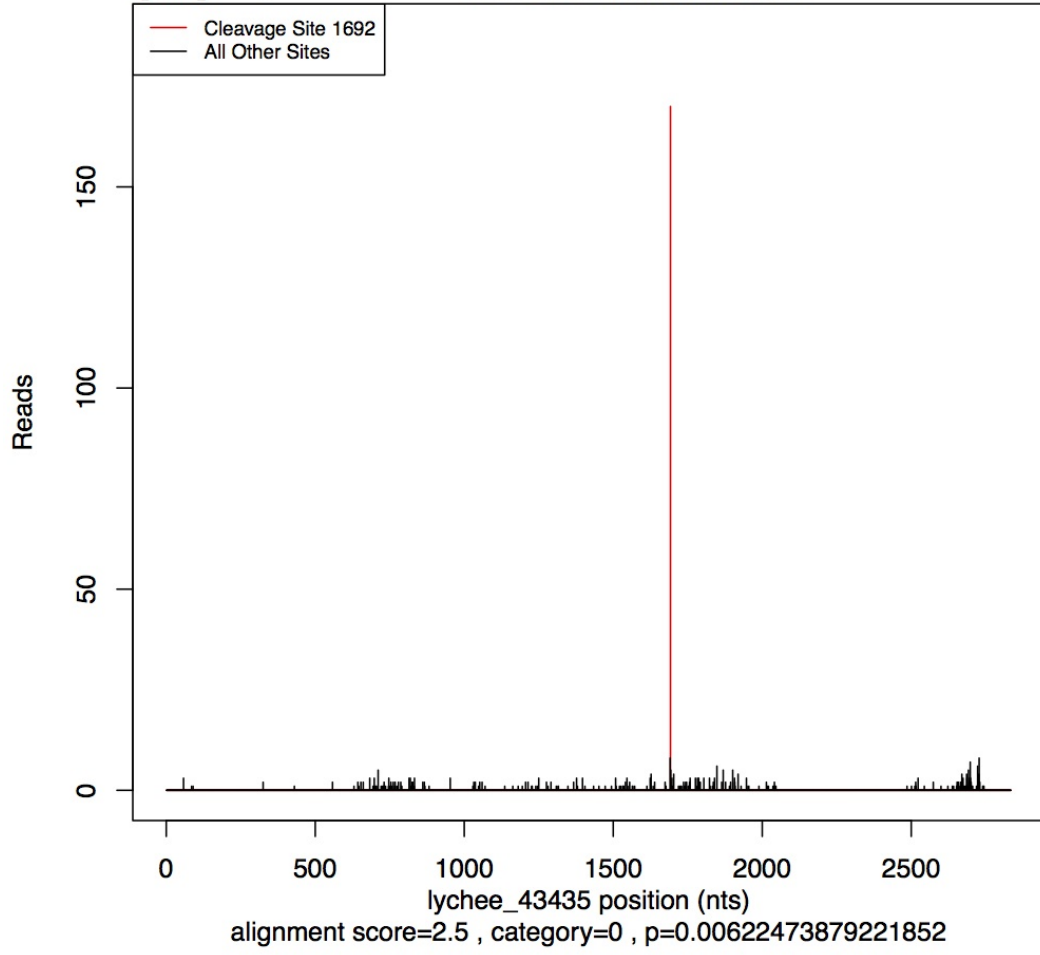

27\_miR159\_1692\_lychee\_43435

target 5' UGAAGUUGGAAGCUCCCUuCACUCCAAUACCCAGAAAC 3'

:: ::::::::::: :::::

query 3' UCUAGGGAAGUUAGGUUC 5'

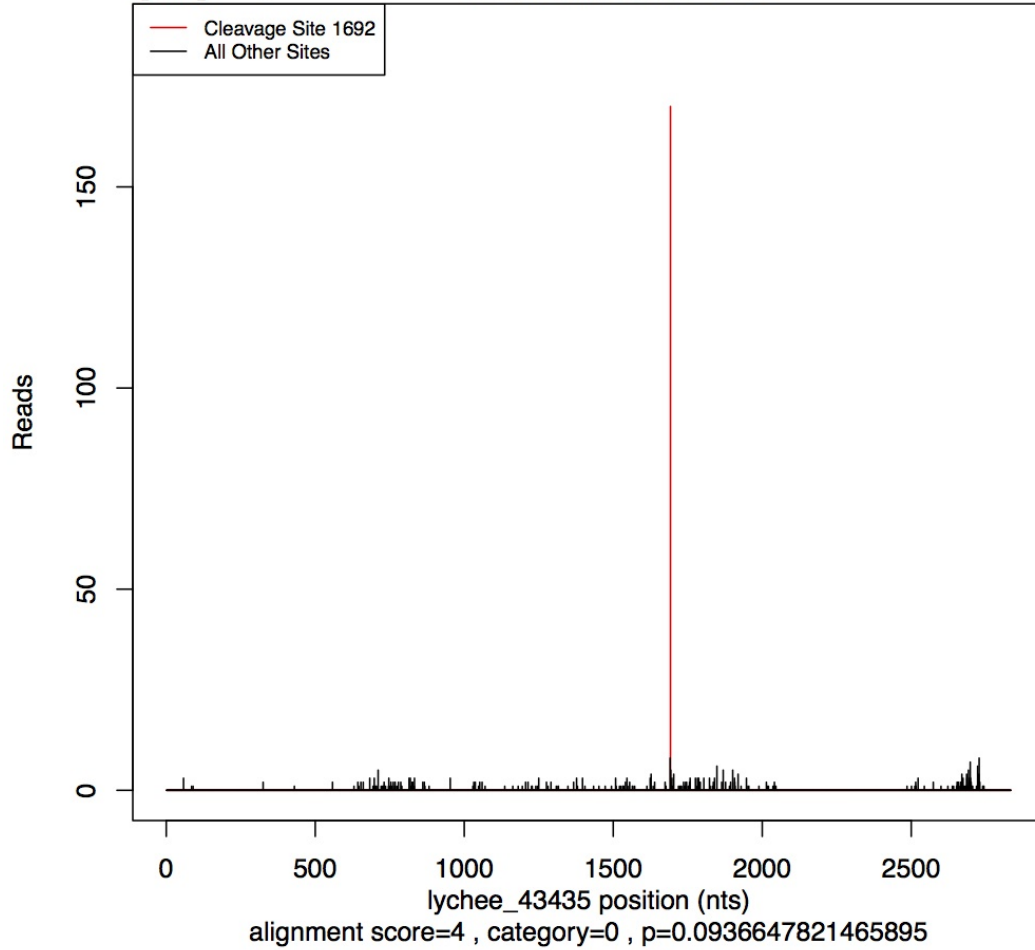

29\_miR159\_1692\_lychee\_43435

target 5' AGUGAAGUUGGGAGCUCUCCUuCACUCCAAUACCCAGAAAC 3'

query 3' ..... :.....  
UCUCGAGGGAAGUUAGGUUG 5'

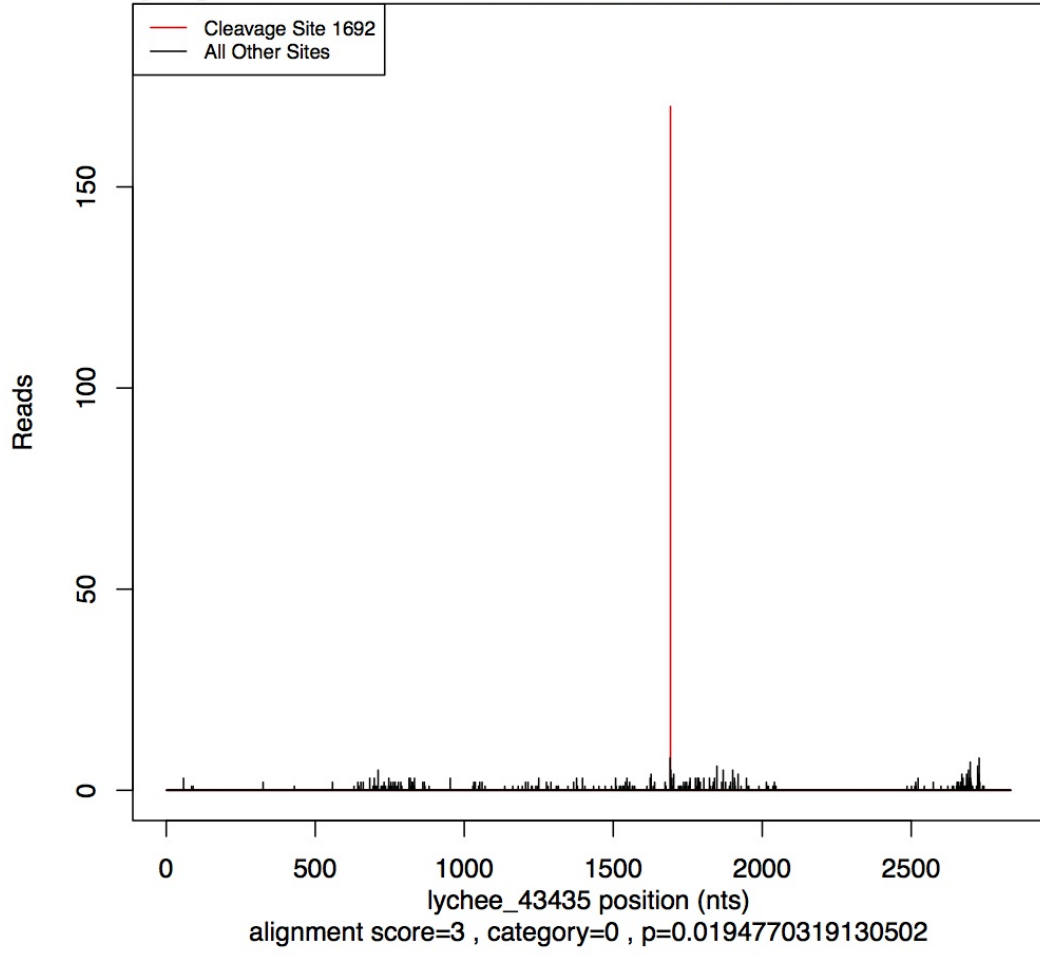

40\_miR159\_1692\_lychee\_43435

target 5' UGAAGUUGGAAGCUCCCUuCACUCCAAUACCCAGAAAC 3'

.....

query 3' UCGAGGGAAGUUAGGUUU 5'

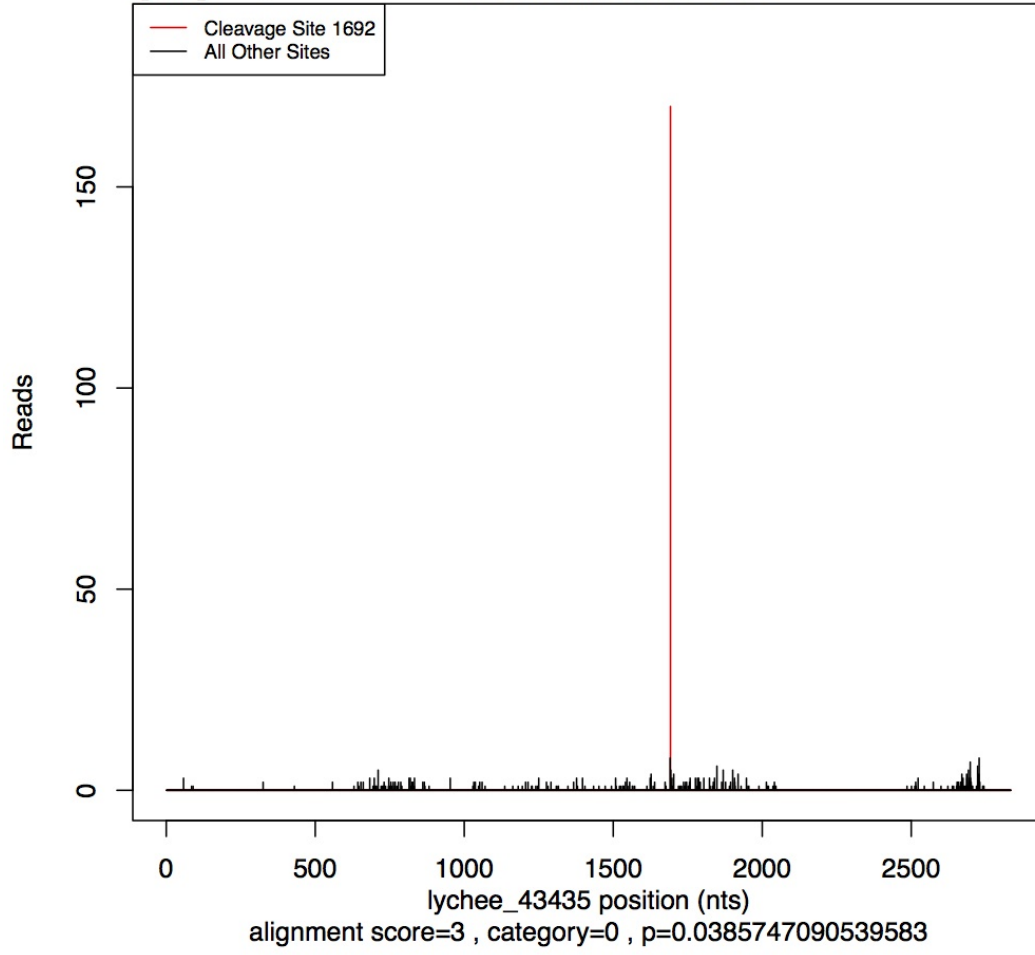

41\_miR159\_1692\_lychee\_43435

target 5' AGUGAAGUUGGGAGCUCUCCUuCACUCCAAUACCCAGAAAC 3'

..... : .....

query 3' ACUCGAGGGAAGUUAGGUUU 5'

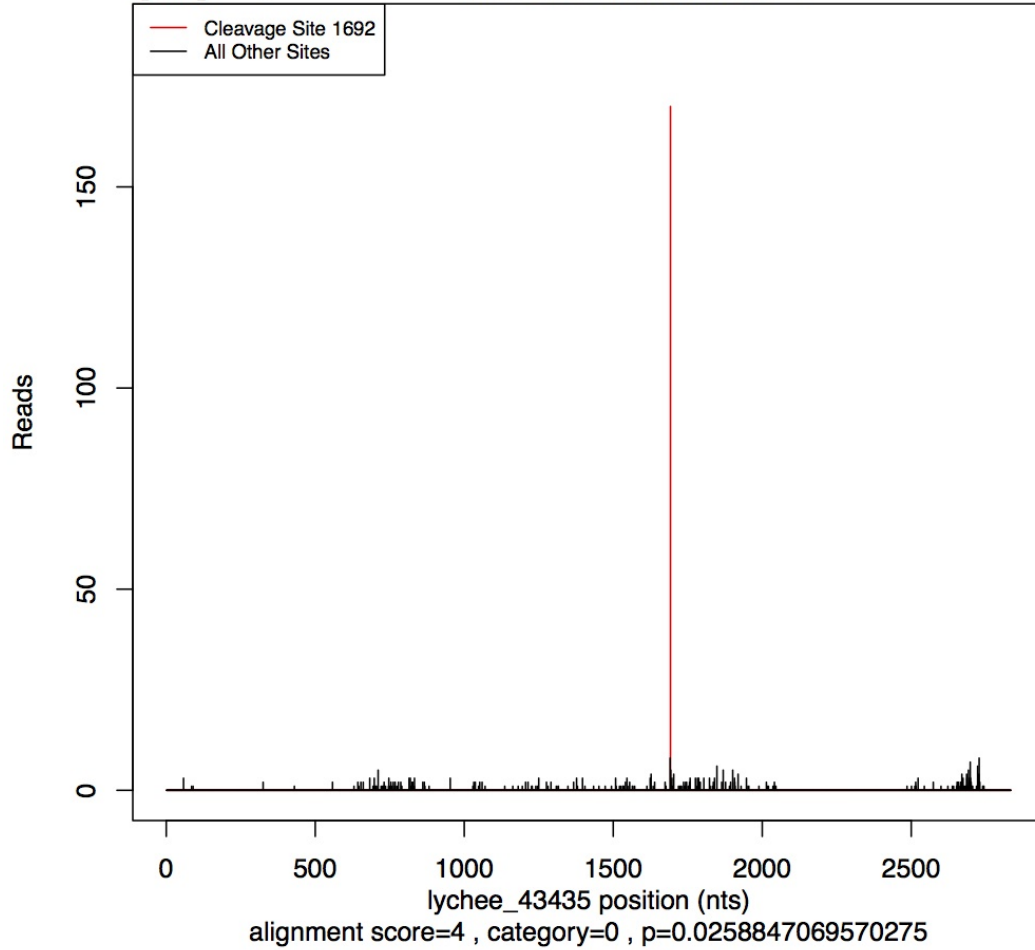

42\_miR159\_1692\_lychee\_43435

target 5' AGUGAAGUUGGGAGCUCUCCUuCACUCCAAUACCCAGAAAC 3'

..... : .....

query 3' CCUCGAGGGAAGUUAGGUUU 5'

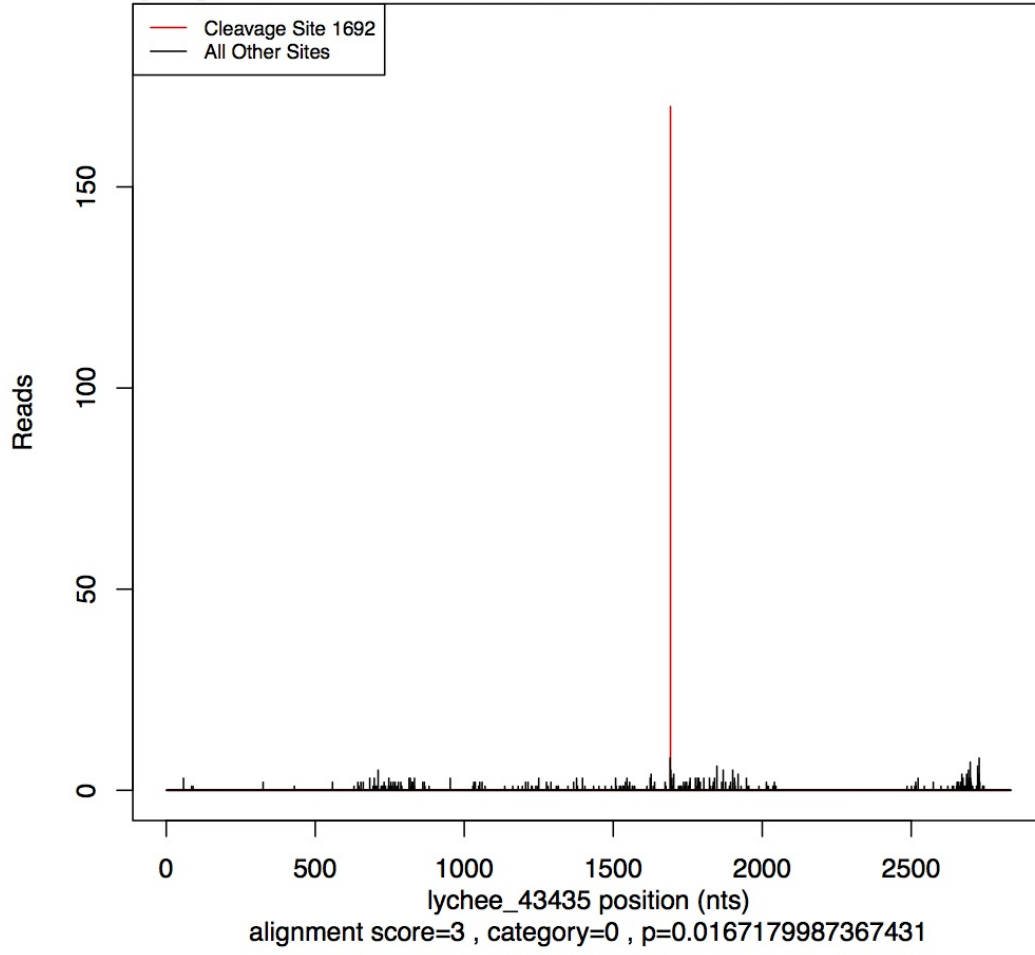

45\_miR159\_1692\_lychee\_43435

target 5' UGAAGUUGGAAGCUCUUuCACUCCAAUACCCAGAAAC 3'

:: :::::::::: :::::

query 3' UCUAGGGAAGUUAGGUUA 5'

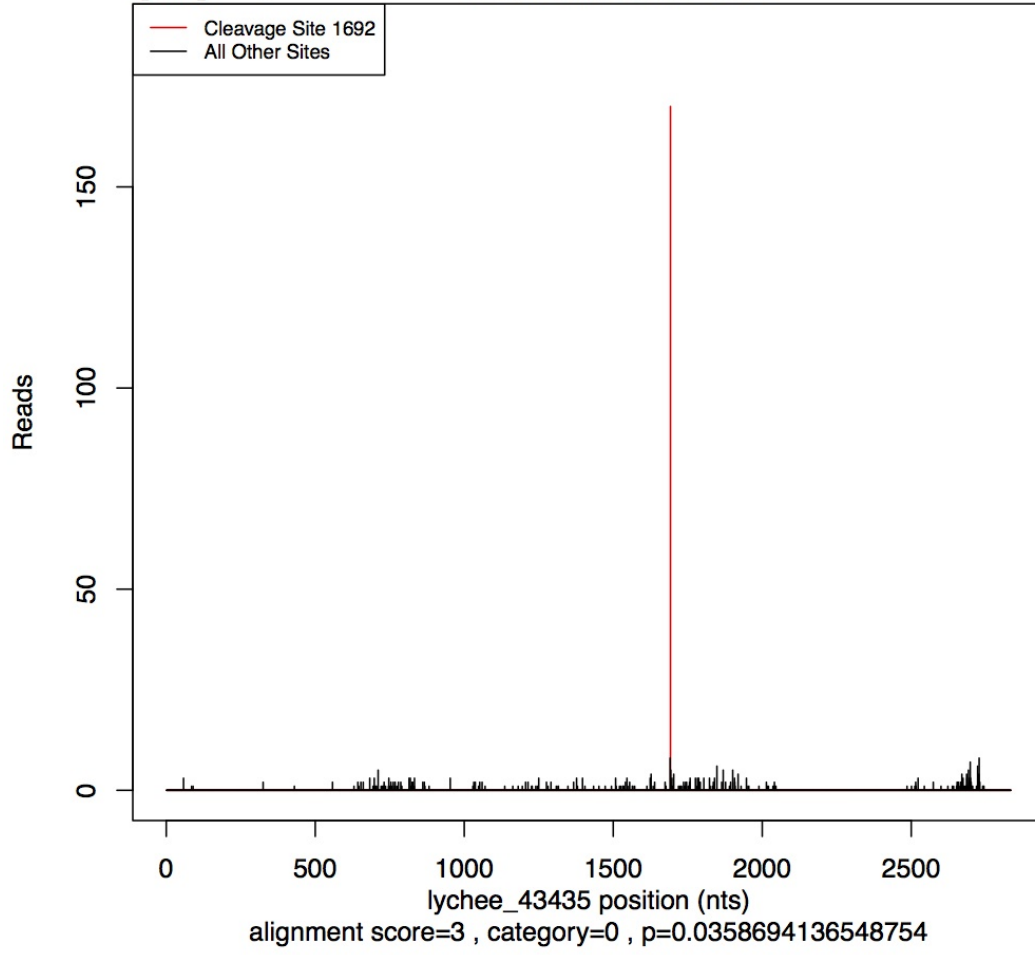

56\_miR159\_1692\_lychee\_43435

target 5' AGUGAAGUUGGGAGCUCUCCUuCACUCCAAUACCCAGAAAC 3'

query 3' ..... : : : : :  
UCUCGAGGGAAGUAAGGUUU 5'

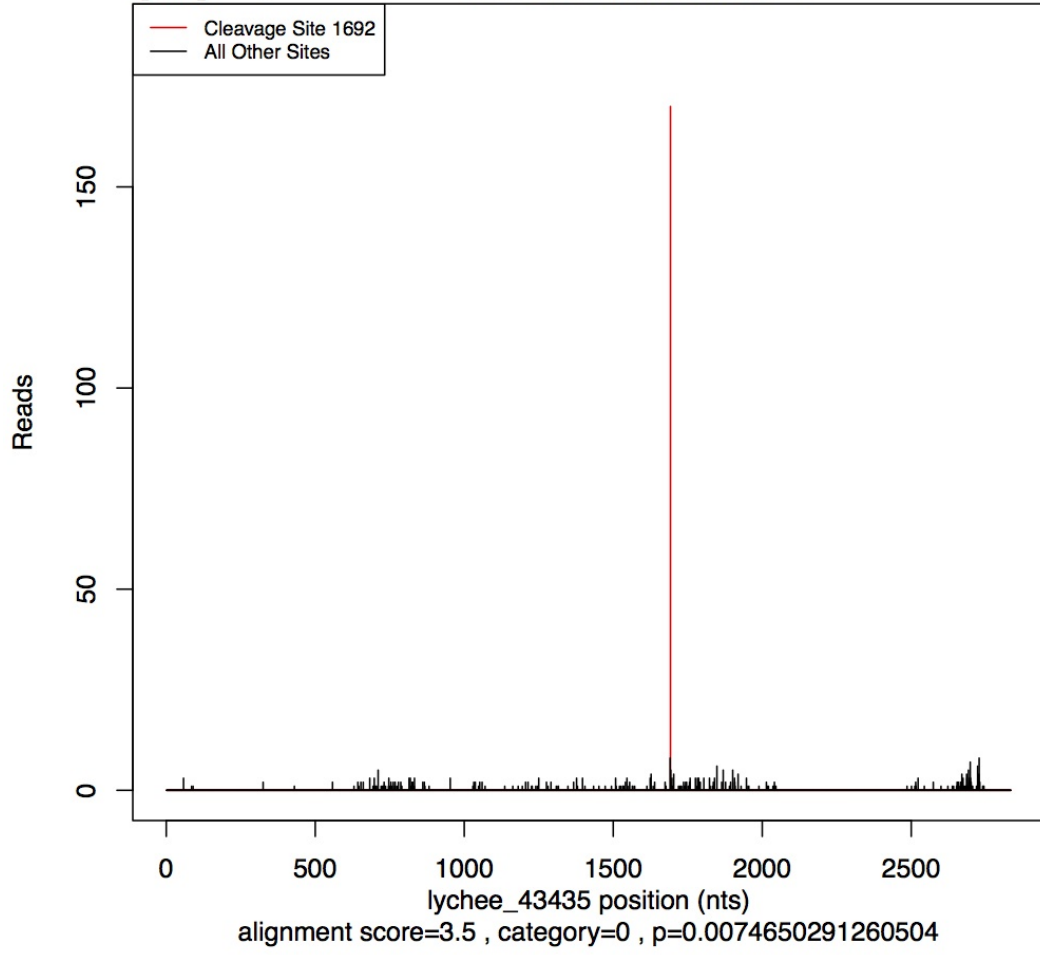



57\_miR159\_1692\_lychee\_43435

target 5' AGUGAAGUUGGGAGCUCCCUuCACUCCAAUACCCAGAAAC 3'

query 3' ..... : : : : :  
UCUCGAGGGAAGUCAGGUUU 5'

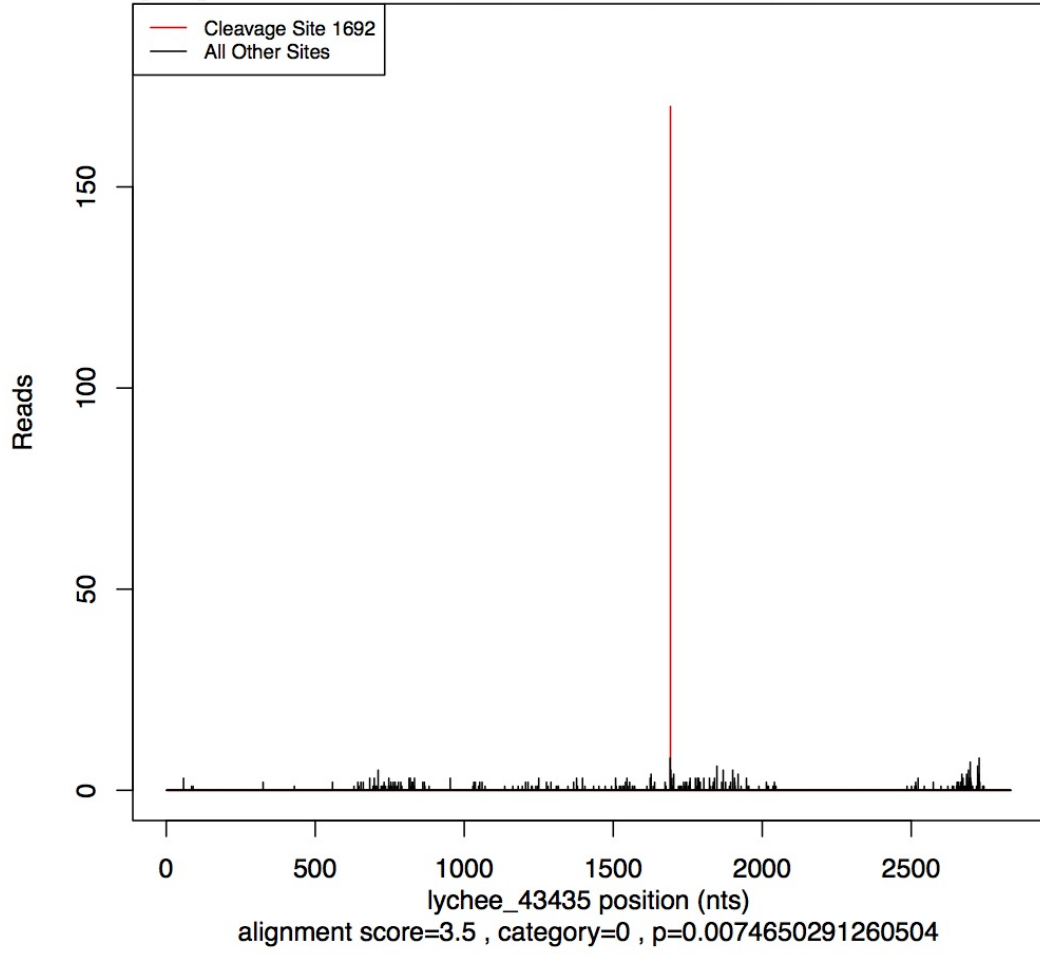

65\_miR159\_1692\_lychee\_43435

target 5' CAGUGAAGUUUGGAGCUCCCUuCACUCCAAUACCCAGAAAC 3'

..... : .....

query 3' UCCUCGAGGGAAGUUAGGUUU 5'

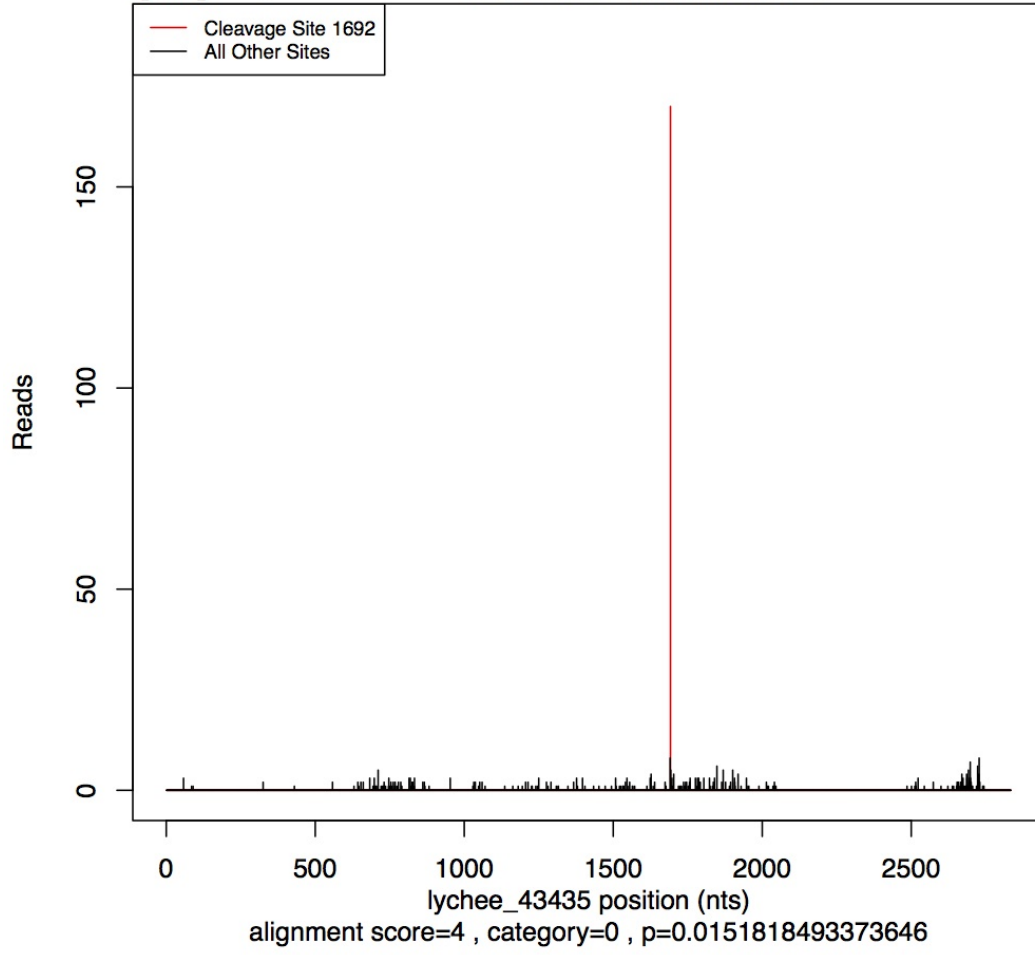





73\_miR159\_1692\_lychee\_43435

target 5' AGUGAAGUUGGGAGCUCUUuCACUCCAAUACCCAGAAAC 3'

. . . . . : : : : :

query 3' UCUCGGGGGAAGUUAGGUUU 5'

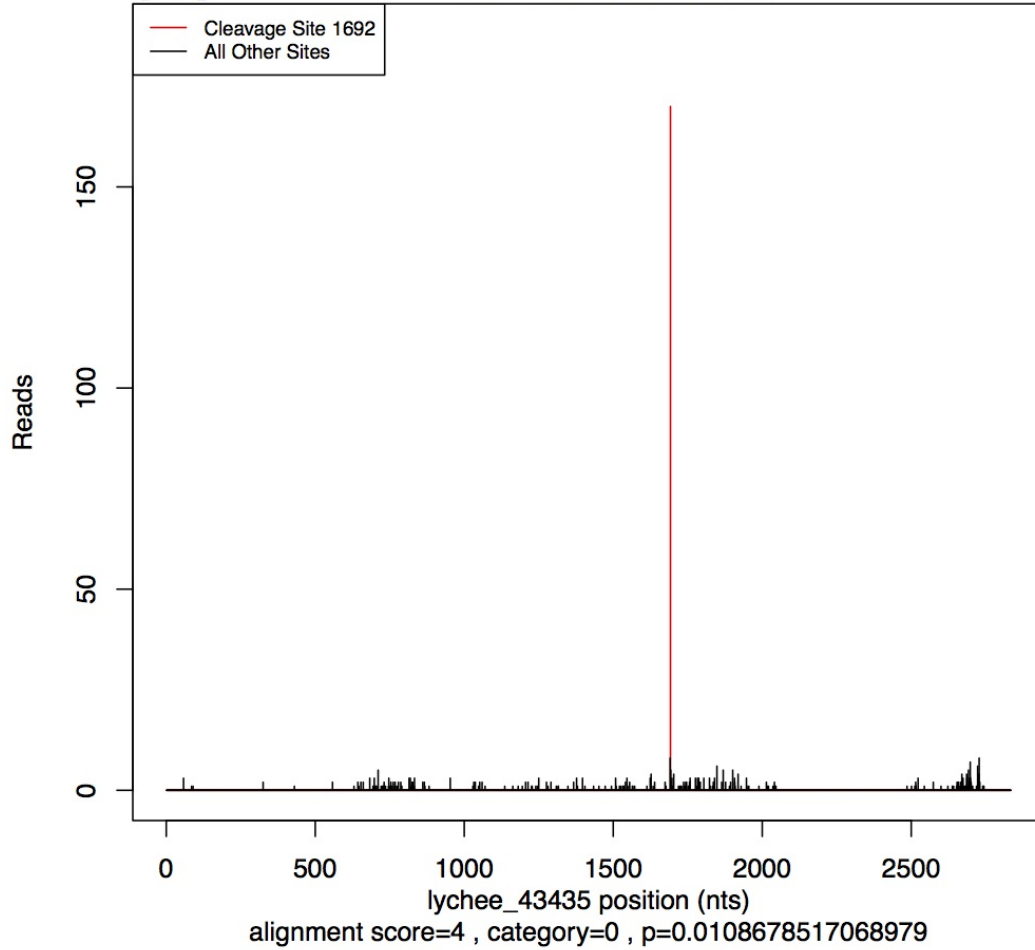

83\_miR165\_11\_lychee\_12179

target 5' UGAAUAAGGAUGAAGcCUGGUCCGGAUUCGGUUGG 3'

query 3' .....  
UCUACUUCGGACCAGGCU 5'

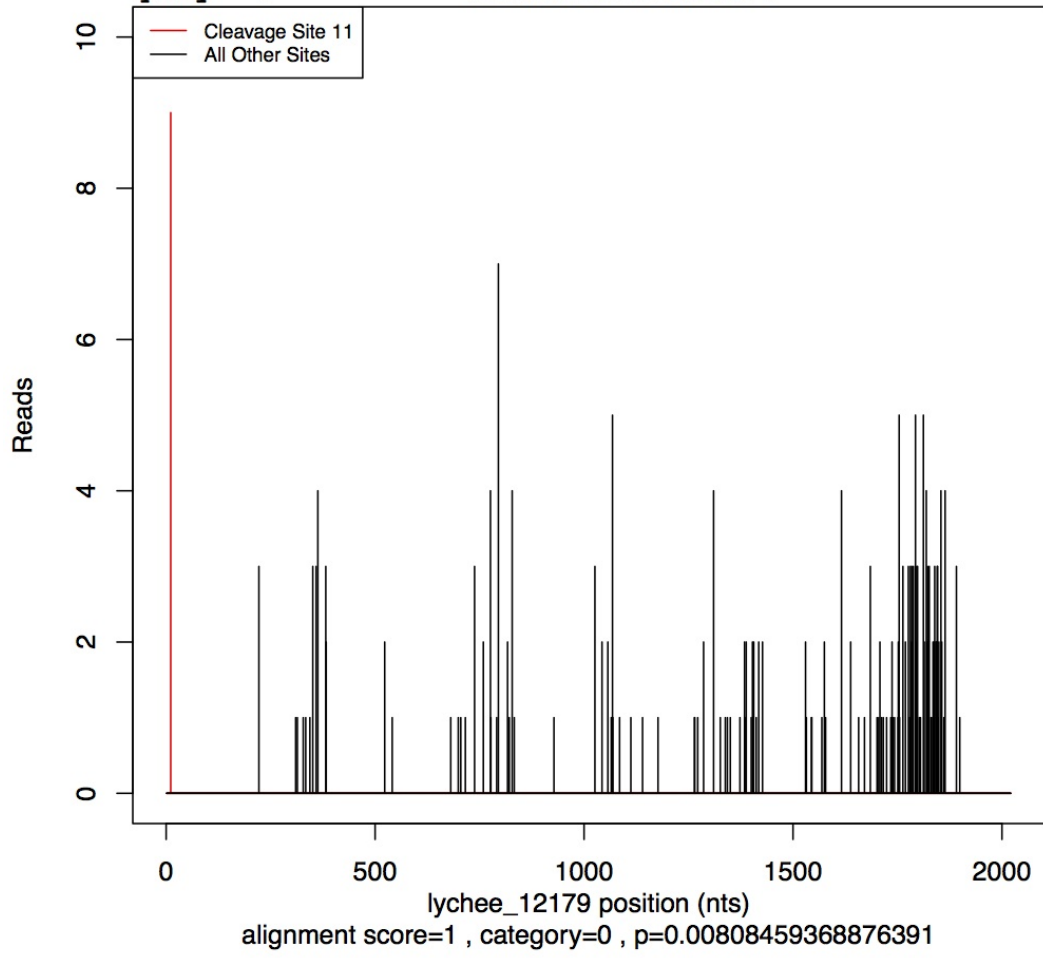

83\_miR165\_9405\_lychee\_50219

target 5' AGAUGAUUGGGGAUGAAGcCUGGUCCGGAUUCUAUUGG 3'

query 3' .....  
UCUACUUCGGACCAGGCU 5'

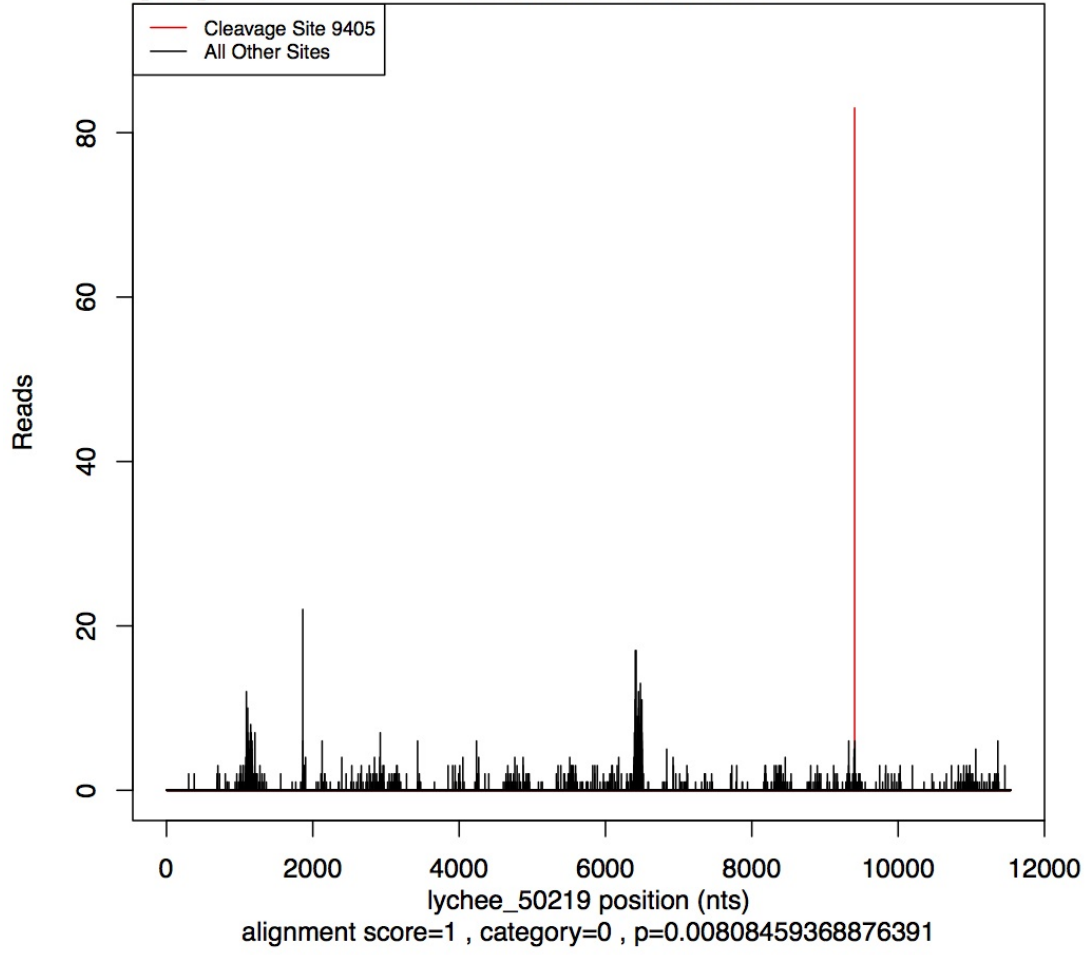

97\_miR166\_11\_lychee\_12179

target 5' GUUGAAUAAUGGGAUGAAGcCUGGUCCGGAUUCGGUUGG 3'

.....

query 3' UCCUACUUCGGACCAGGCU 5'

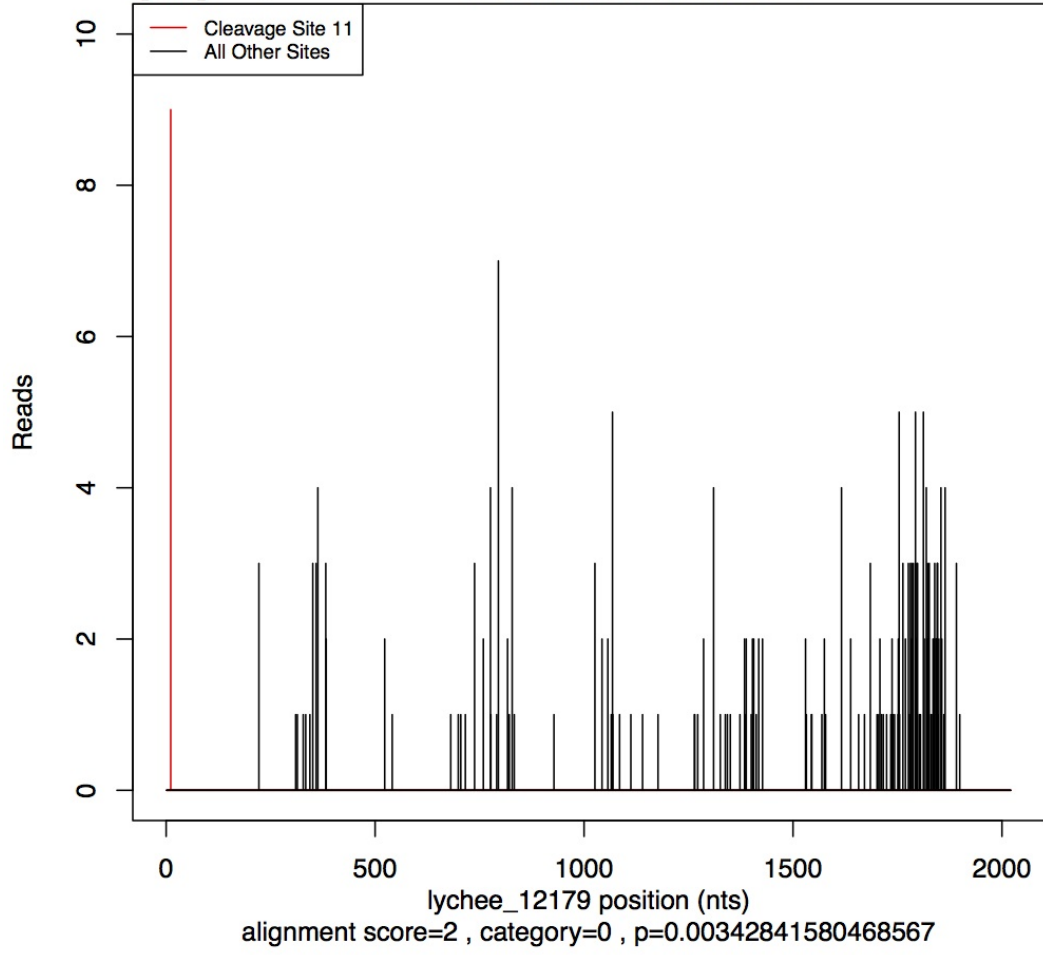



99\_miR166\_11\_lychee\_12179

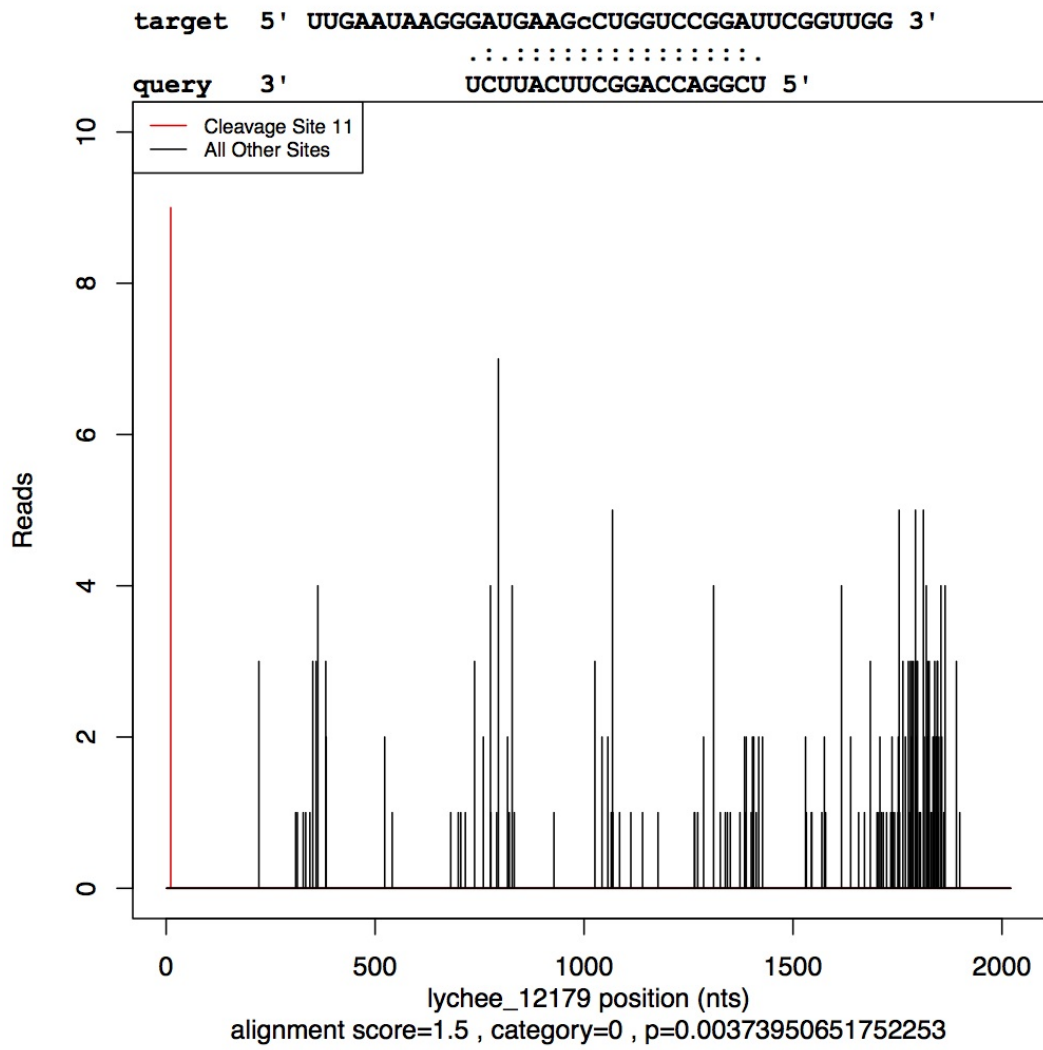

100\_miR166\_11\_lychee\_12179

target 5' GUUGAAUAAUGGGAUGAAGcCUGGUCCGGAUUCGGUUGG 3'

.....

query 3' UCUUUACUUCGGACCAGGCU 5'

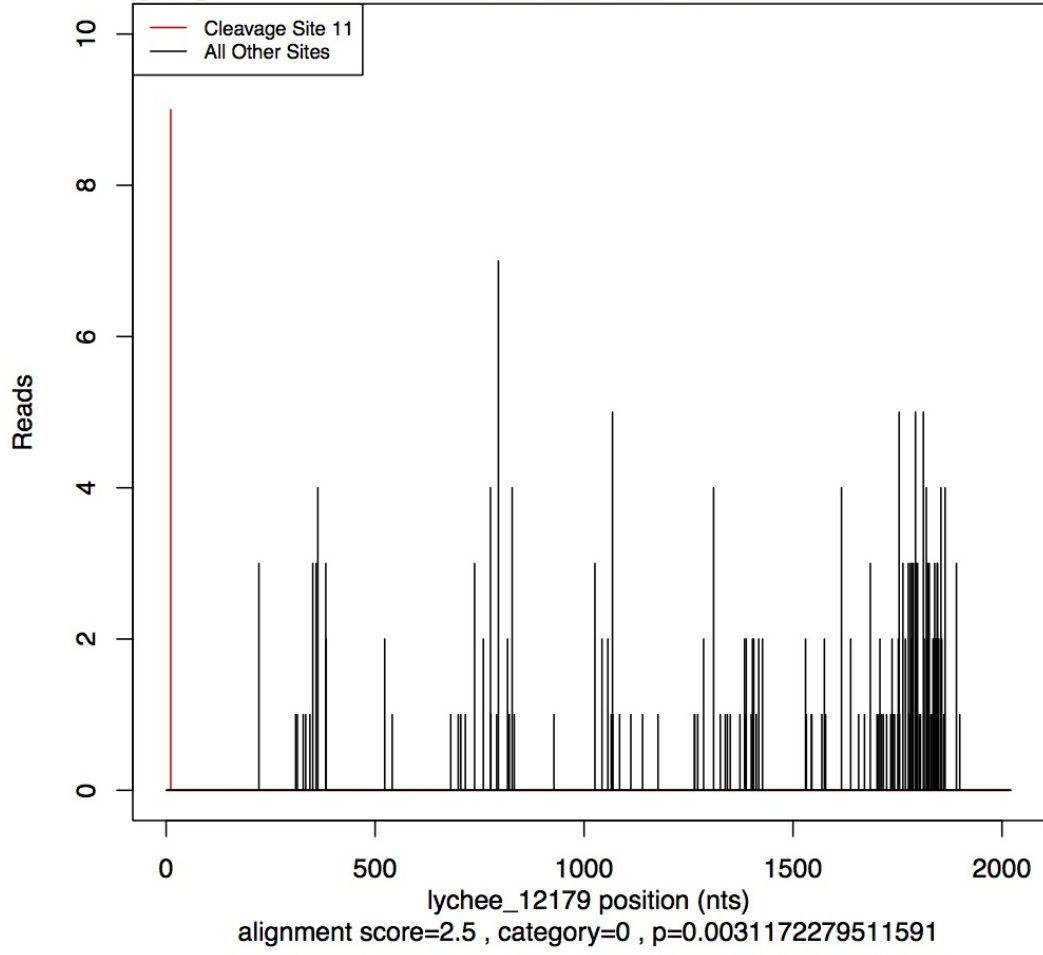

133\_miR319\_1692\_lychee\_43435

target 5' AGUGAAGUUGGGAGCUCCCUuCACUCCAAUACCCAGAAAC 3'

..... : .....

query 3' CCUCGAGGGAAGUUAGGUUU 5'

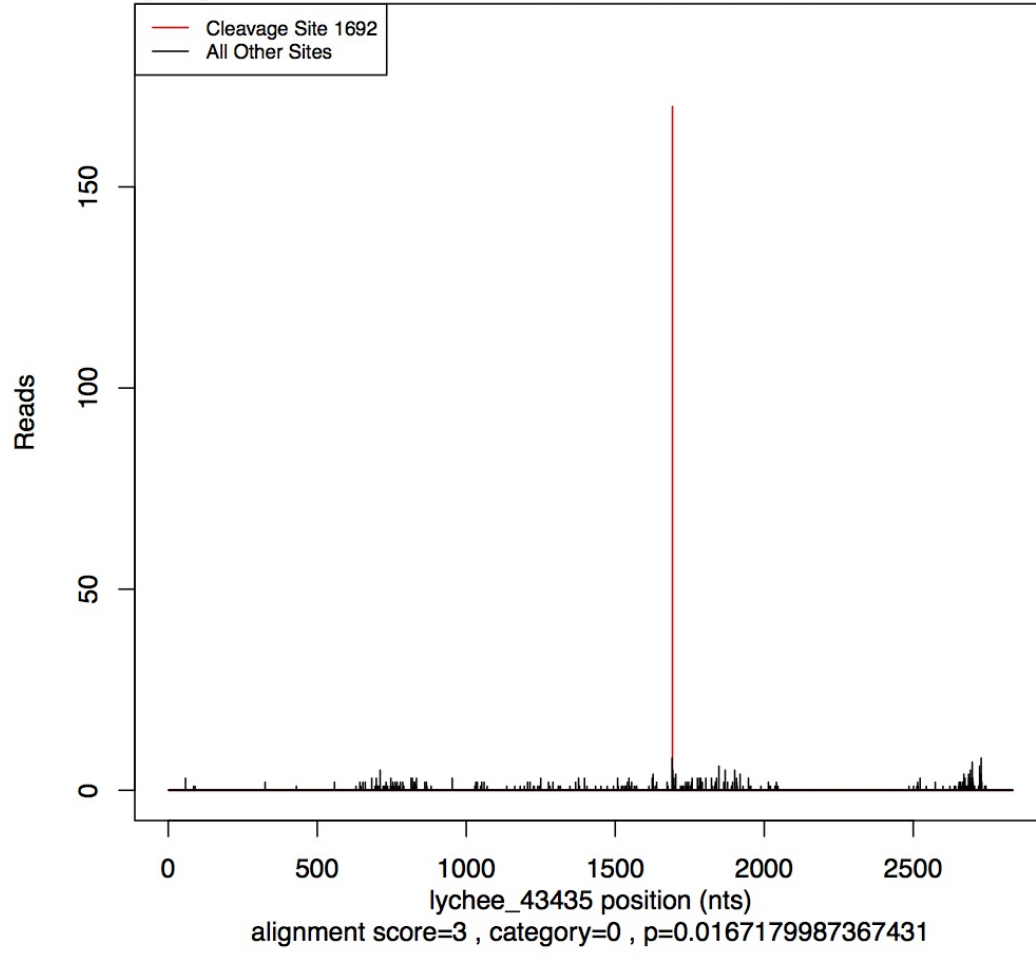

139\_miR319\_1692\_lychee\_43435

target 5' AGUGAAGUUGGGAGCUCUCCUuCACUCCAAUACCCAGAAAC 3'

query 3' ..... : : : : :  
UCUCGAGGGAAGUCAGGUUU 5'



140\_miR319\_1692\_lychee\_43435

target 5' CAGUGAAGUUUGGAGCUCCCUuCACUCCAAUACCCAGAAAC 3'

.....

query 3' UCCUCGAGGGAAGUUAGGUUU 5'

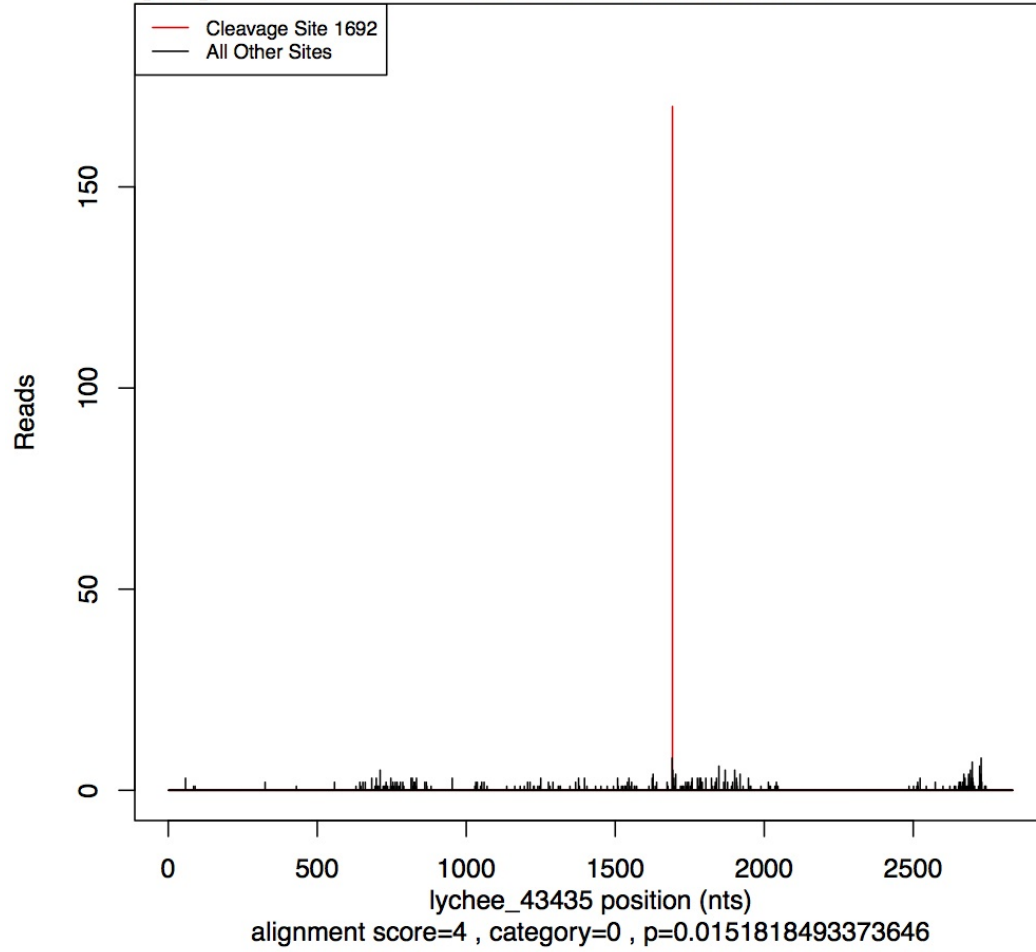

145\_miR393\_1613\_lychee\_55456

target 5' GAAAGUAUGAAGA-CAAUGCGAuCCCUUUGGAUGUCGUCCUG 3'

::: ::::::::::::::::::::

query 3' UCUAGUUACGCUAGGGAAACCU 5'

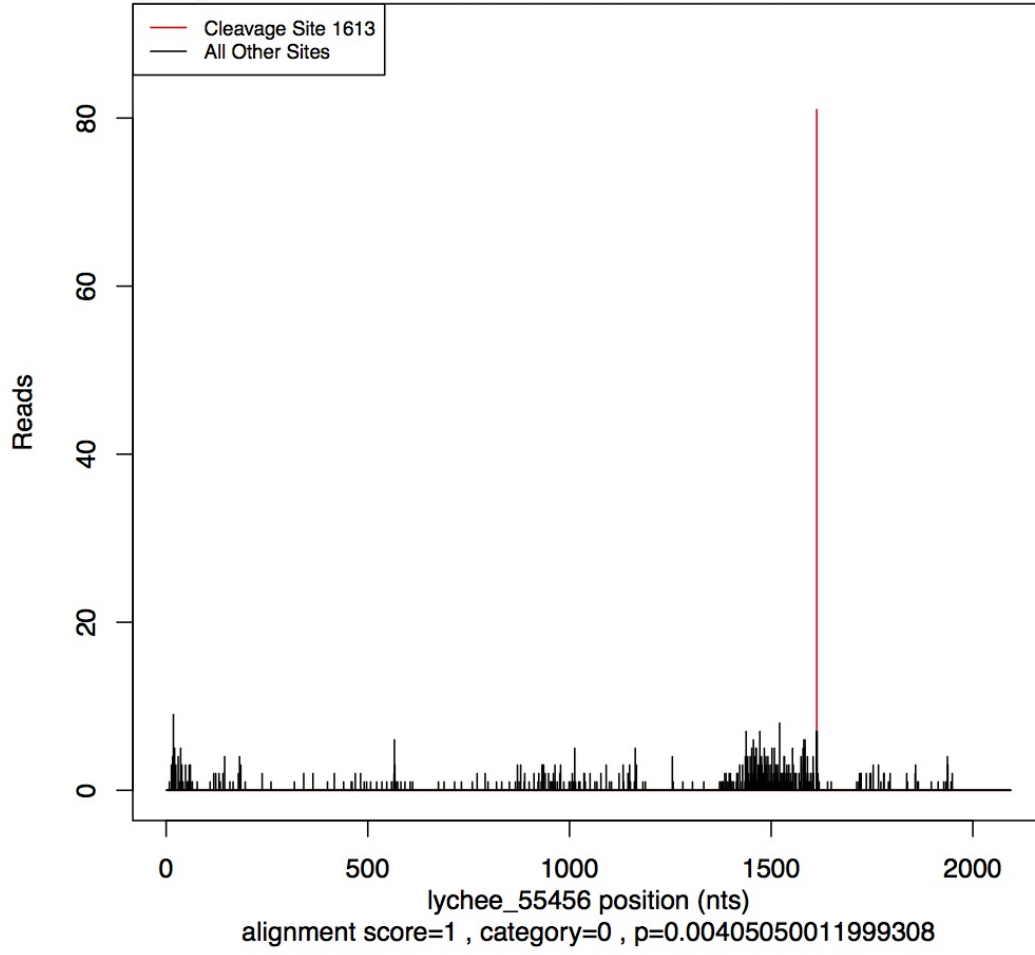

147\_miR393\_1613\_lychee\_55456

target 5' GGAAAGUAUGGAGACAAUGCGAuCCCUUUGGAUGUCGUCCUG 3'

query 3' UCUUGUUACGCUAGGGAAACCU 5'

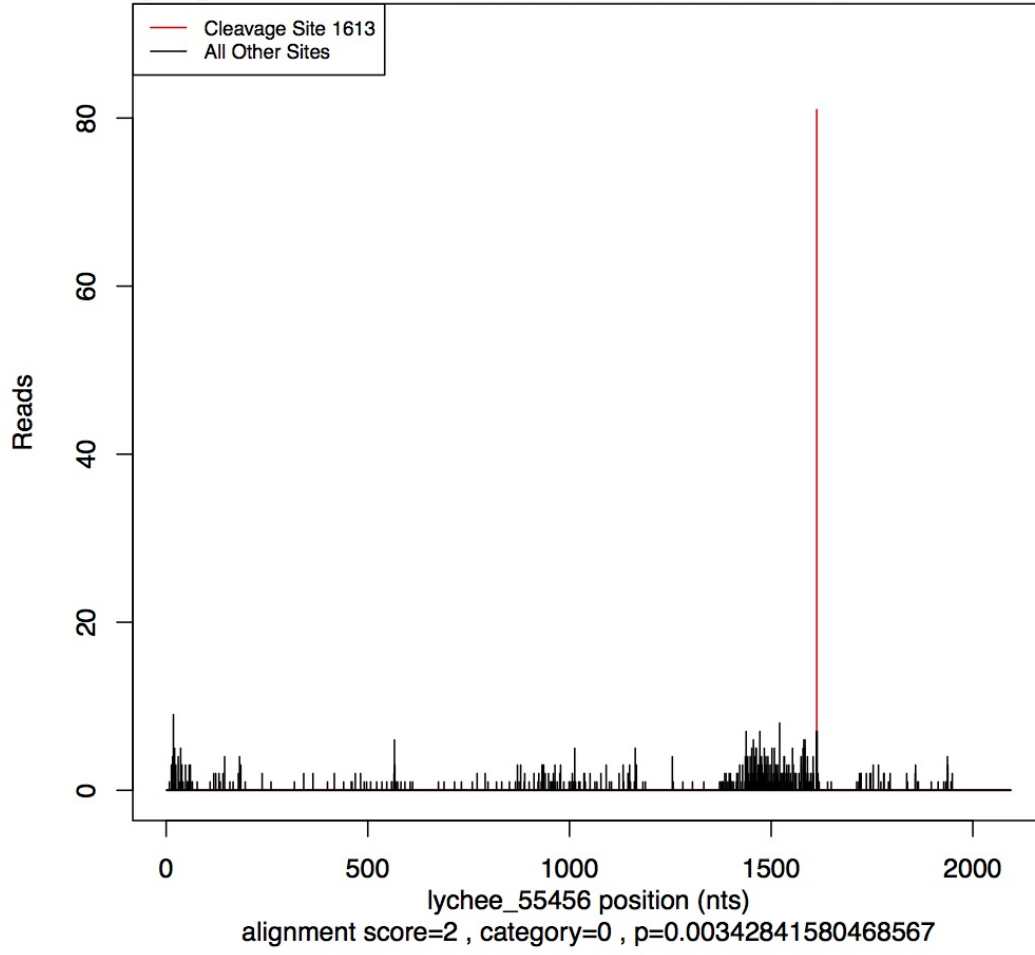

153\_miR393\_1613\_lychee\_55456

target 5' GGAAAGUAUGGAGA-CAAUGCGAuCCCUUUGGAUGUCGUCCUG 3'

:::: ::::::::::::::::::::

query 3' CUCUAGUUACGCUAGGGAAACCU 5'

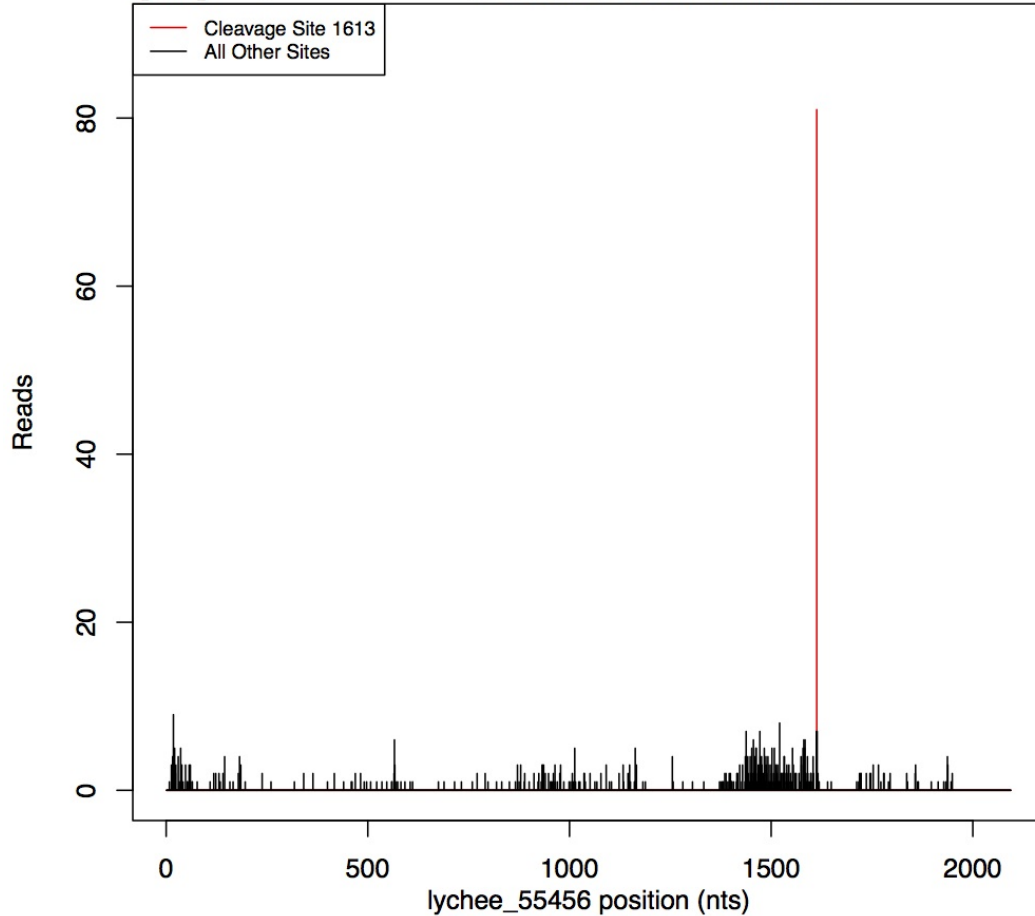

alignment score=1 , category=0 , p=0.00405050011999308





162\_miR396\_1029\_lychee\_55389

target 5' UUGUUGACGUUCAAAAGAUCAGgAAGCUGUGGGAGCUGCUGG 3'

:::: ::::::::::::::

query 3' UCUUCAAGUUCUUUCGACACC 5'

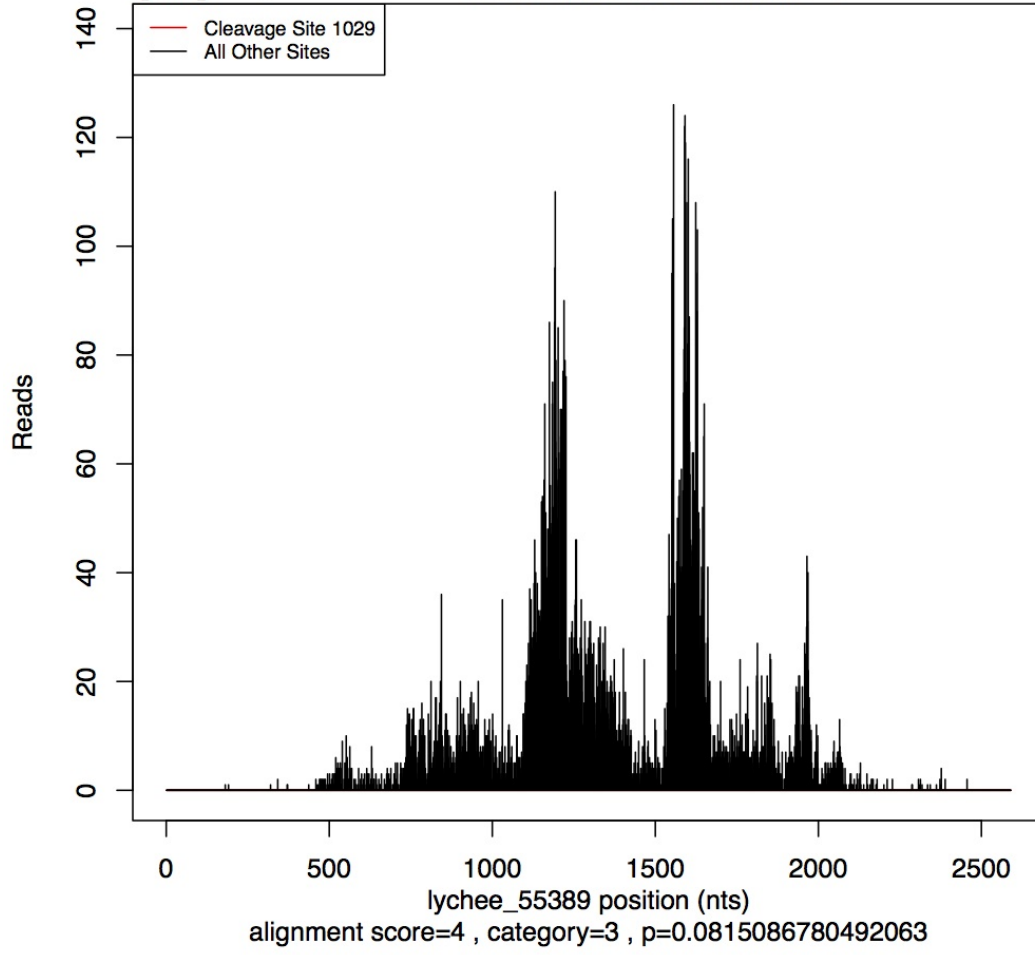

182\_miR396\_1029\_lychee\_55389

target 5' UGACGUCAAAAGAUCAAAGgAAGCUGUGGGAGCUGCUGG 3'

.....

query 3' UCUAGUUCUUUCGACACC 5'

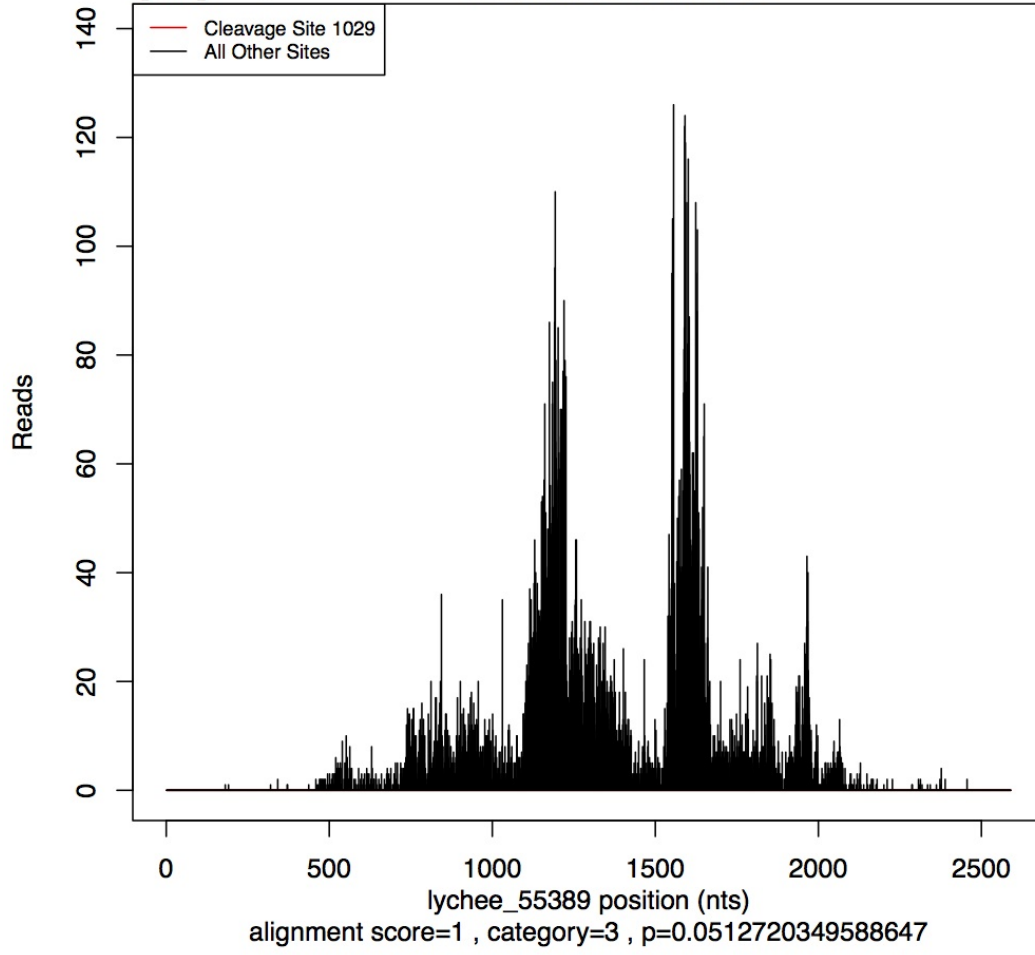

194\_miR396\_1029\_lychee\_55389

target 5' UUGACGUCAAAAGAUCAGgAAGCUGUGGGAGCUCUGG 3'

::: ::::::::::::::::::::

query 3' UUCAAGUUCUUUCGACACC 5'

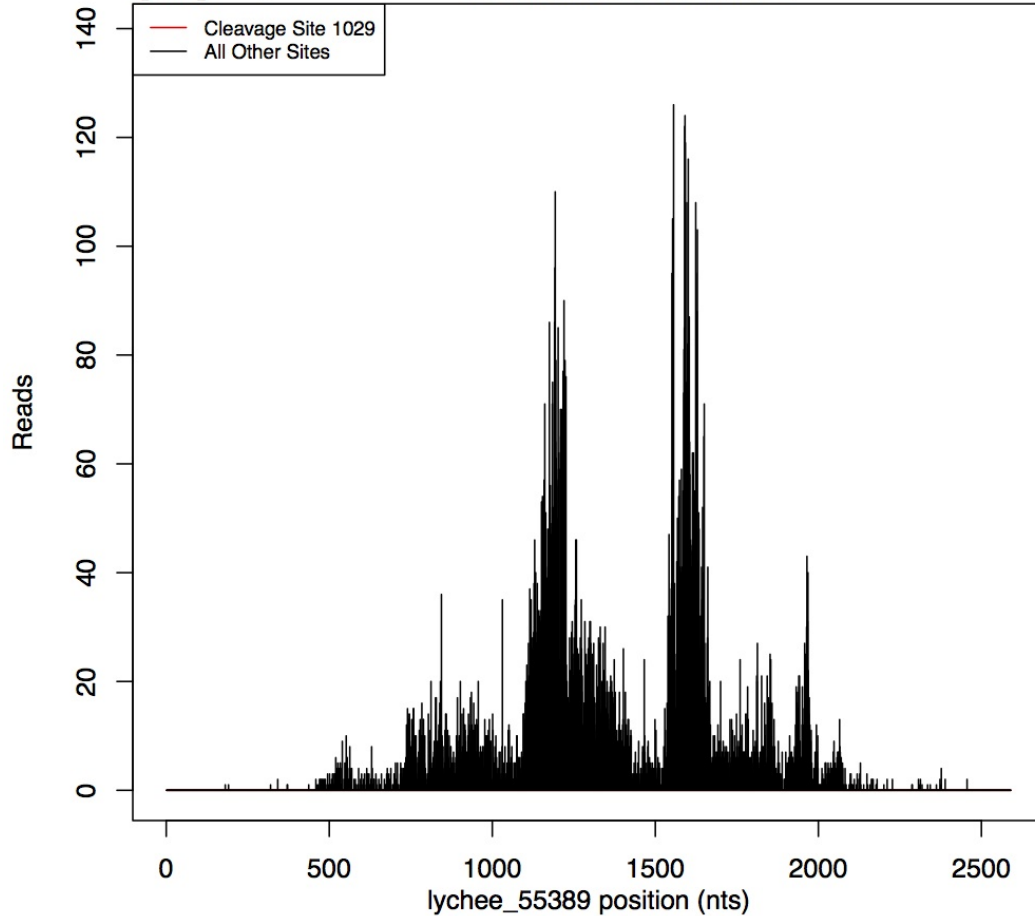

209\_miR398\_107\_lychee\_14851

target 5' AAAUCCUGCAAGGAGCGACCuGAGAUCAACAUGUAUUGGCC 3'

::: :::::::::::::: ::::

query 3' UCC-CGCUGGACUCUUGUGU 5'

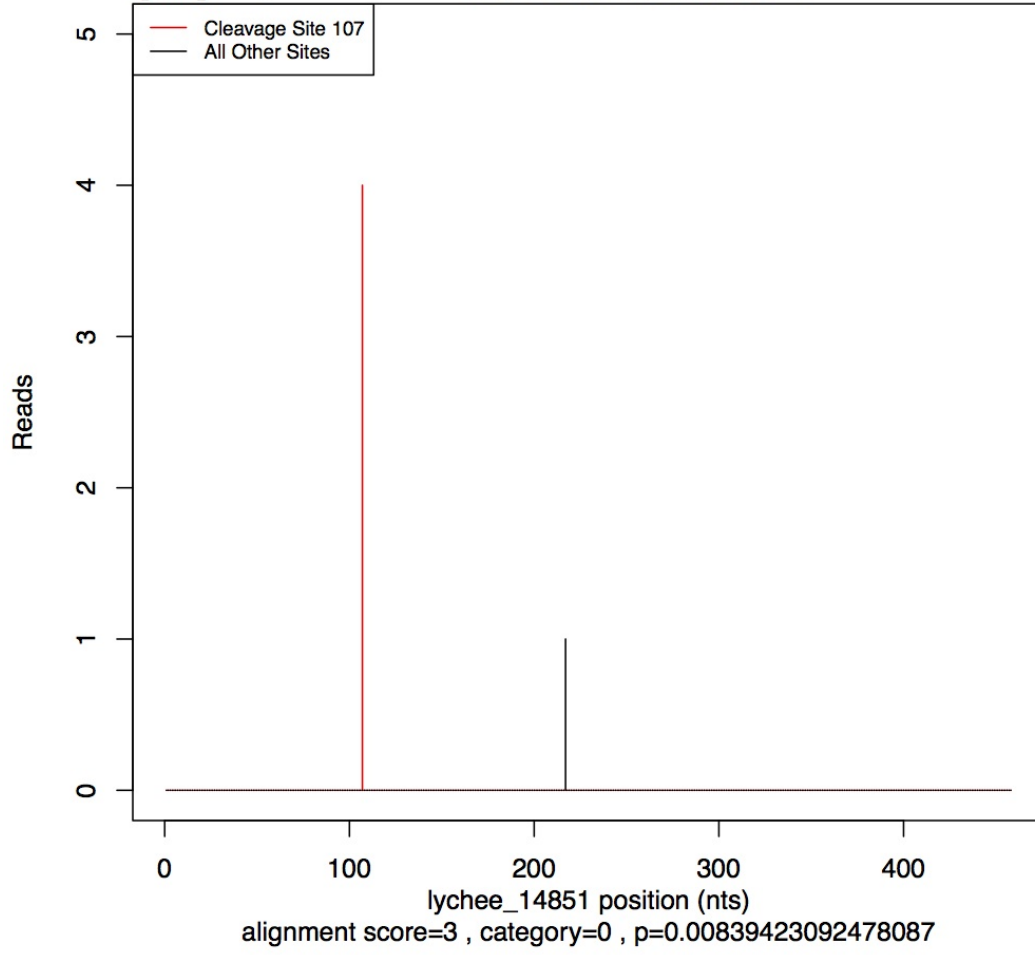

210\_miR398\_107\_lychee\_14851

target 5' AAAUCCUGCAAGGAGCGACCuGAGAUACAUGUAUUGGCC 3'

::. :::::::::::::: ::::

query 3' UCUCGCGUGGACUCUUGUGU 5'

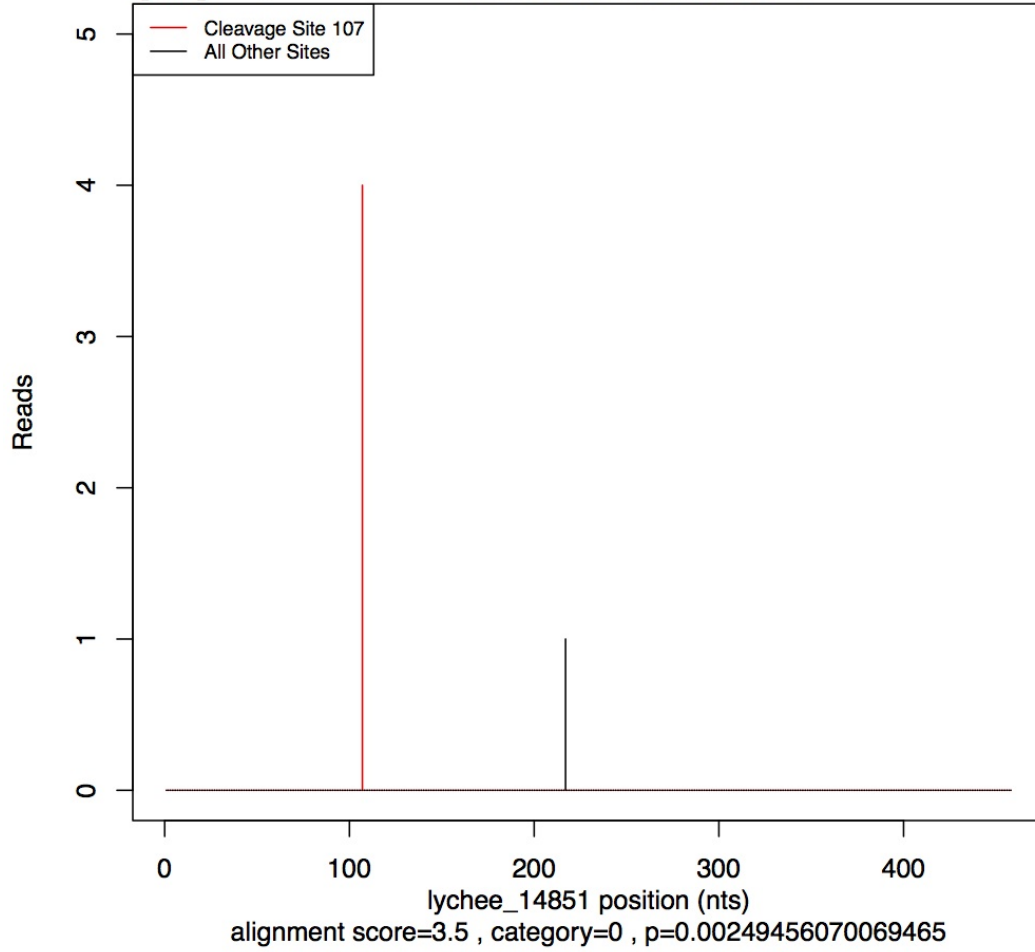













274\_miR858\_185\_lychee\_18326

target 5' UAGAUUACCGGGGAAGAACaGACAACGAAAUAAAAAUG 3'

query 3' .....  
UCUAGCUUGUCUGUUGCUU 5'

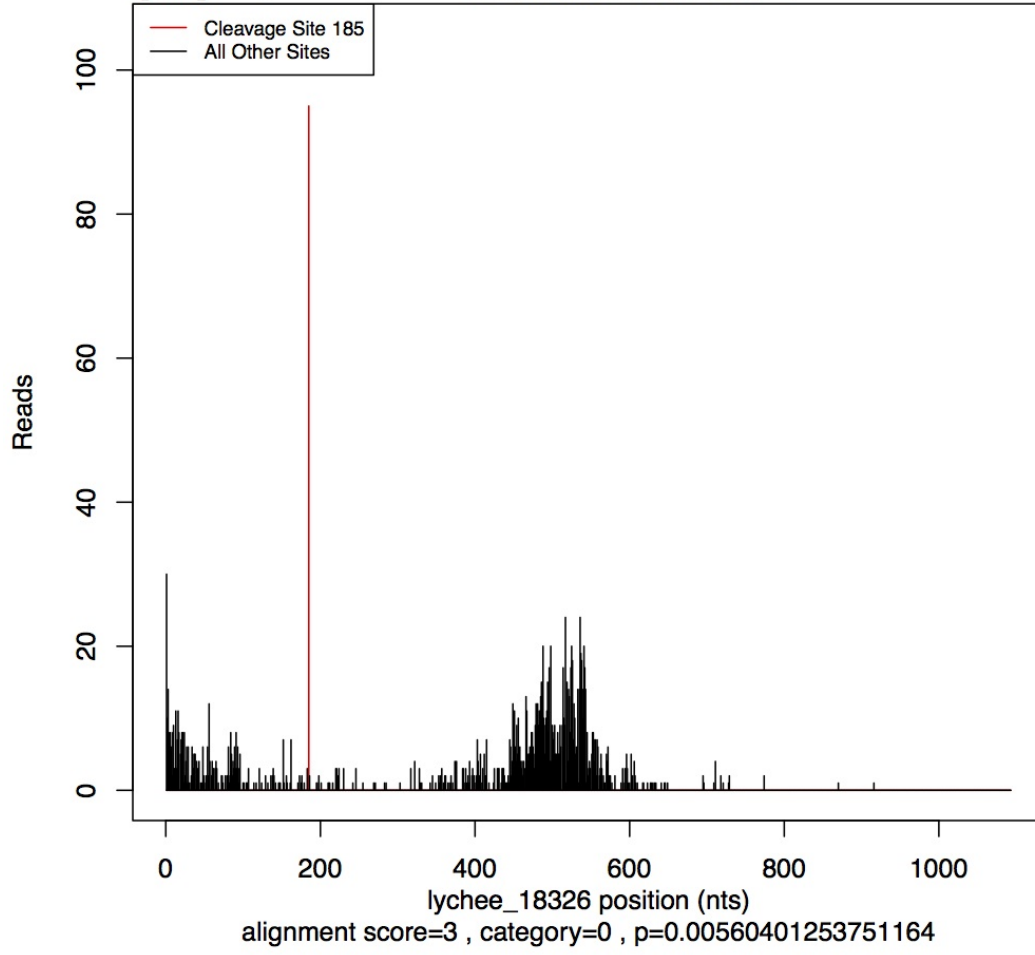

274\_miR858\_356\_lychee\_40412

target 5' GAGGCUUCCAAGGCCGAACaGACAAUGAAAUAAAGAACU 3'

::. :::::::::::::::

query 3' UCUAGCUUGUCUGUUGCUU 5'

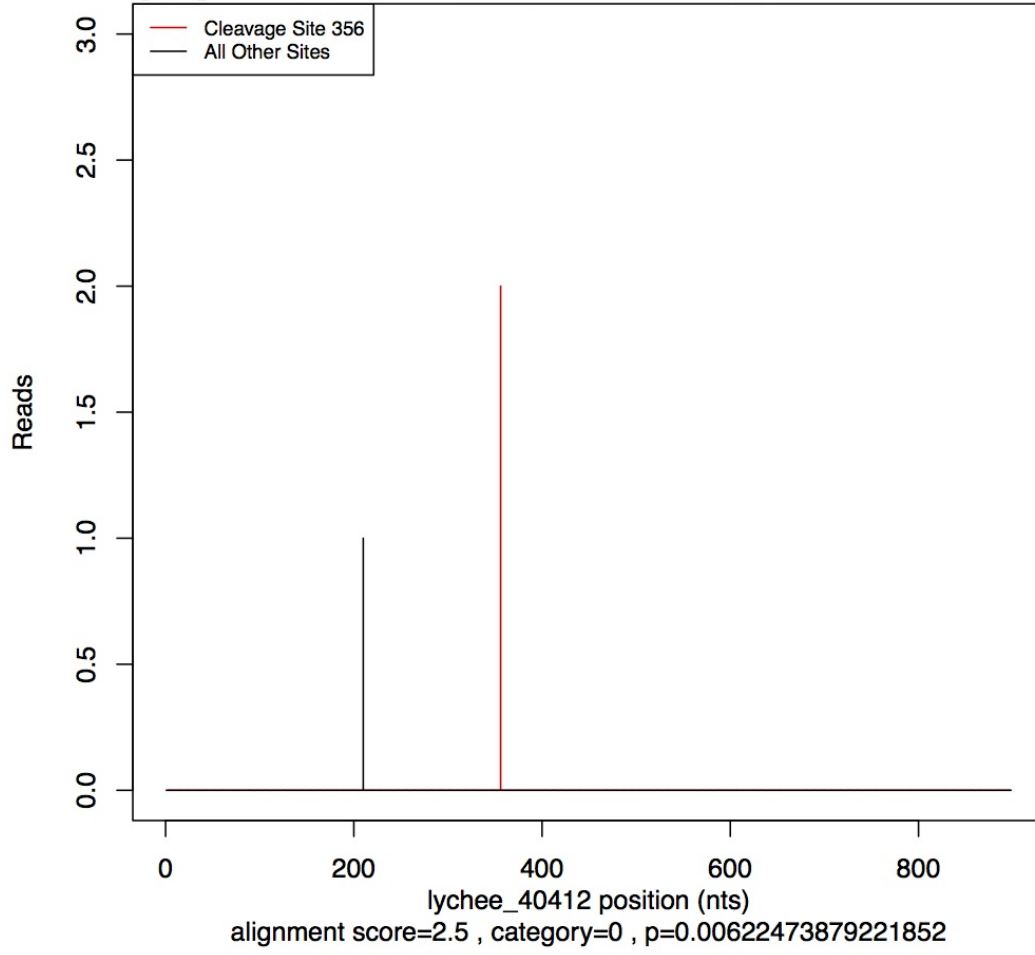

276\_miR858\_185\_lychee\_18326

target 5' UAGAUUACCGGGGAAGAACaGACAACGAAAUAAAAAUG 3'

query 3' .....  
UCCAGCUUGUCUGUUGCUU 5'

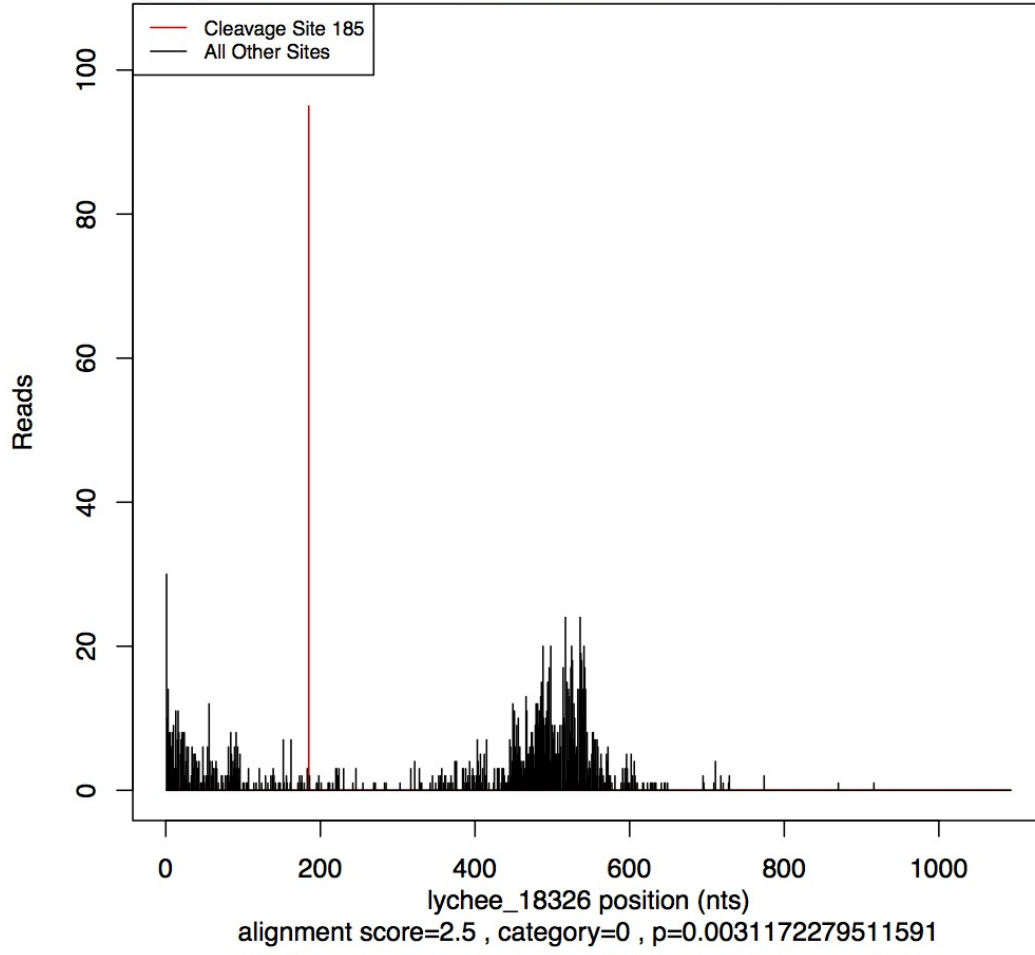

276\_miR858\_356\_lychee\_40412

target 5' GAGGCUUCCAAGGCCGAACaGACAAUGAAAUAAAGAACU 3'

::: :::::::::::::::

query 3' UCCAGCUUGUCUGUUGCUU 5'

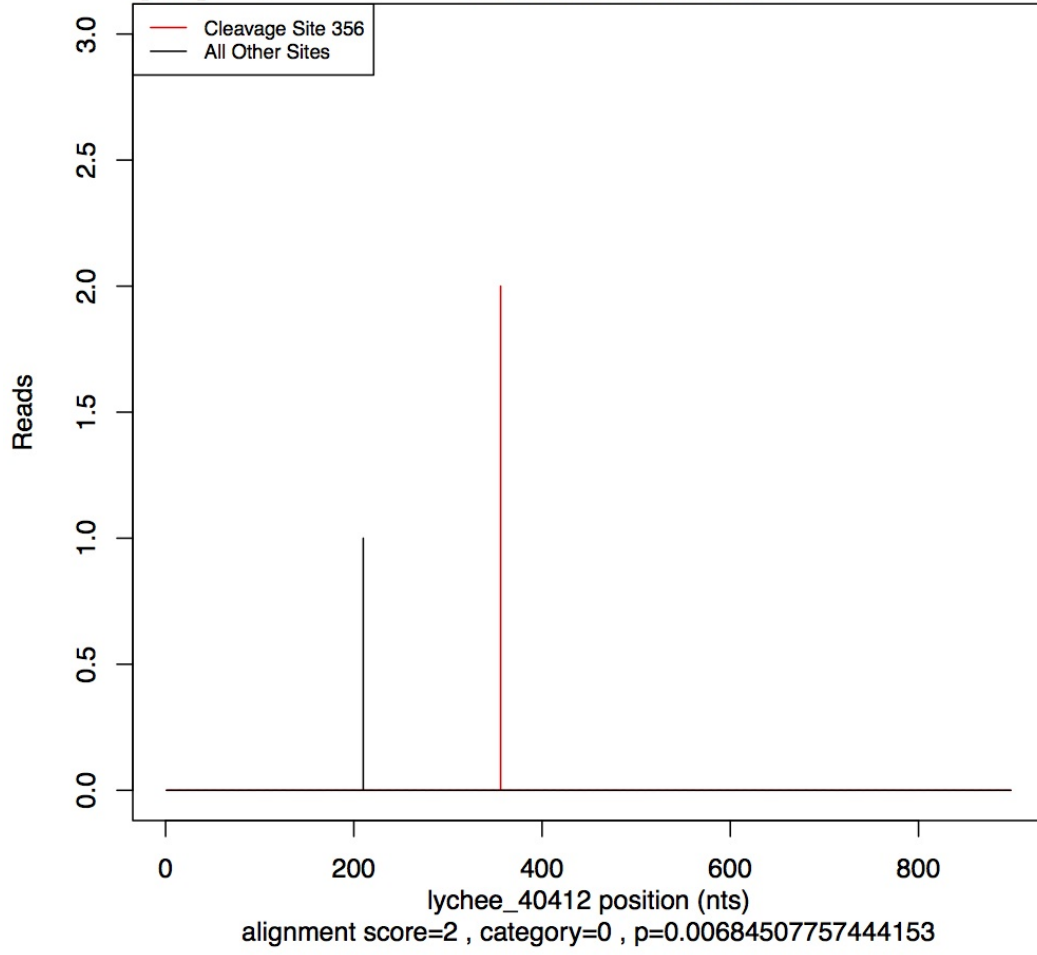

276\_miR858\_475\_lychee\_30086

target 5' AAGAUUACCUUGGAAGAACaGAUAACGAAAUAAAAACU 3'

:: ::::::::::::::

query 3' UCCAGCUUGUCUGUUGCUU 5'

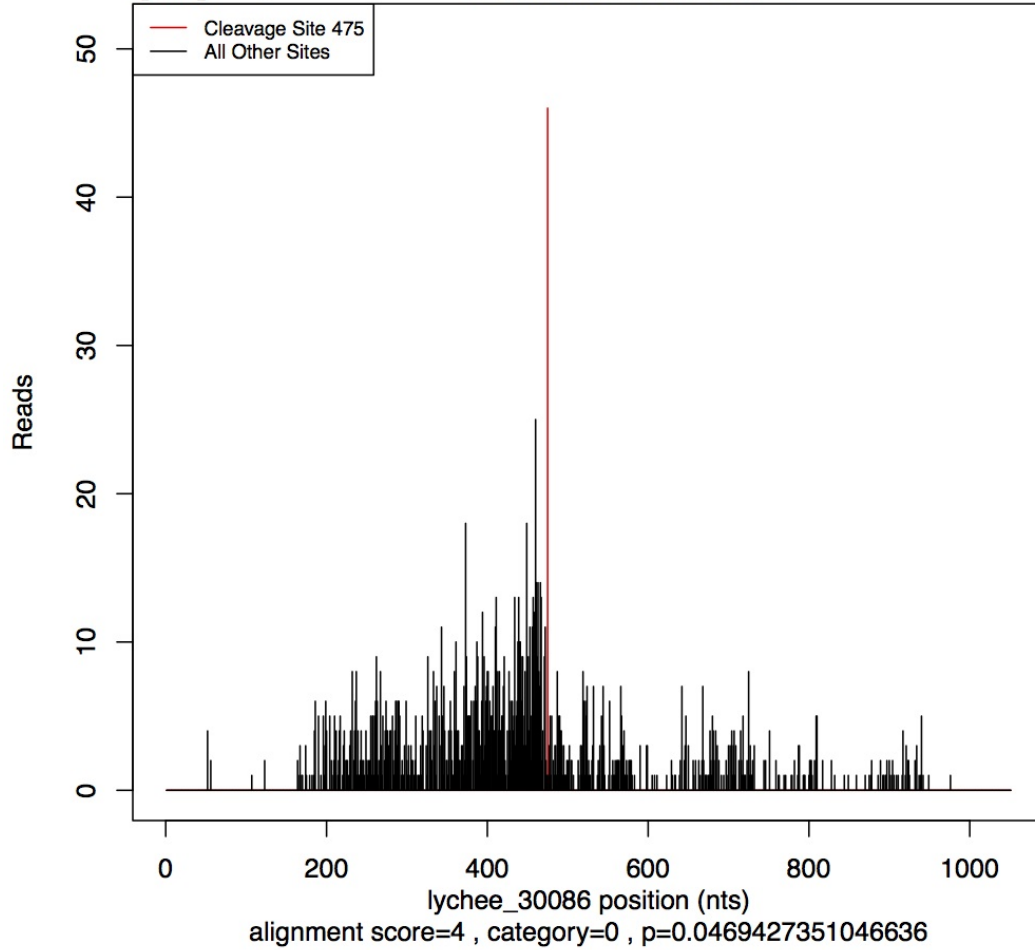





277\_miR858\_356\_lychee\_40412

target 5' GGAGGCUUCCAGGCCGAACaGACAAUGAAAUAAGAACU 3'

... ::::::::::::::

query 3' UCCAGCUUGUCUGUUGCUU 5'

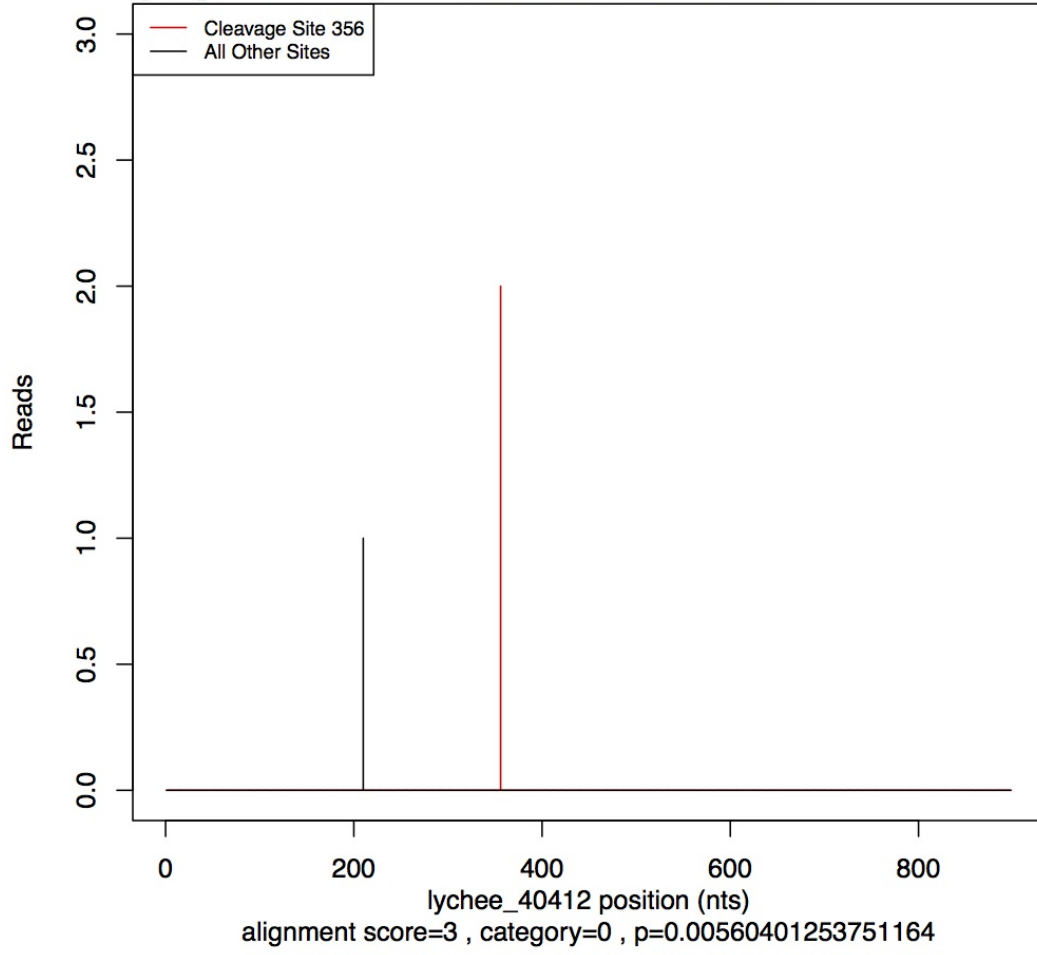

lch-miRC6\_1342\_lychee\_57528

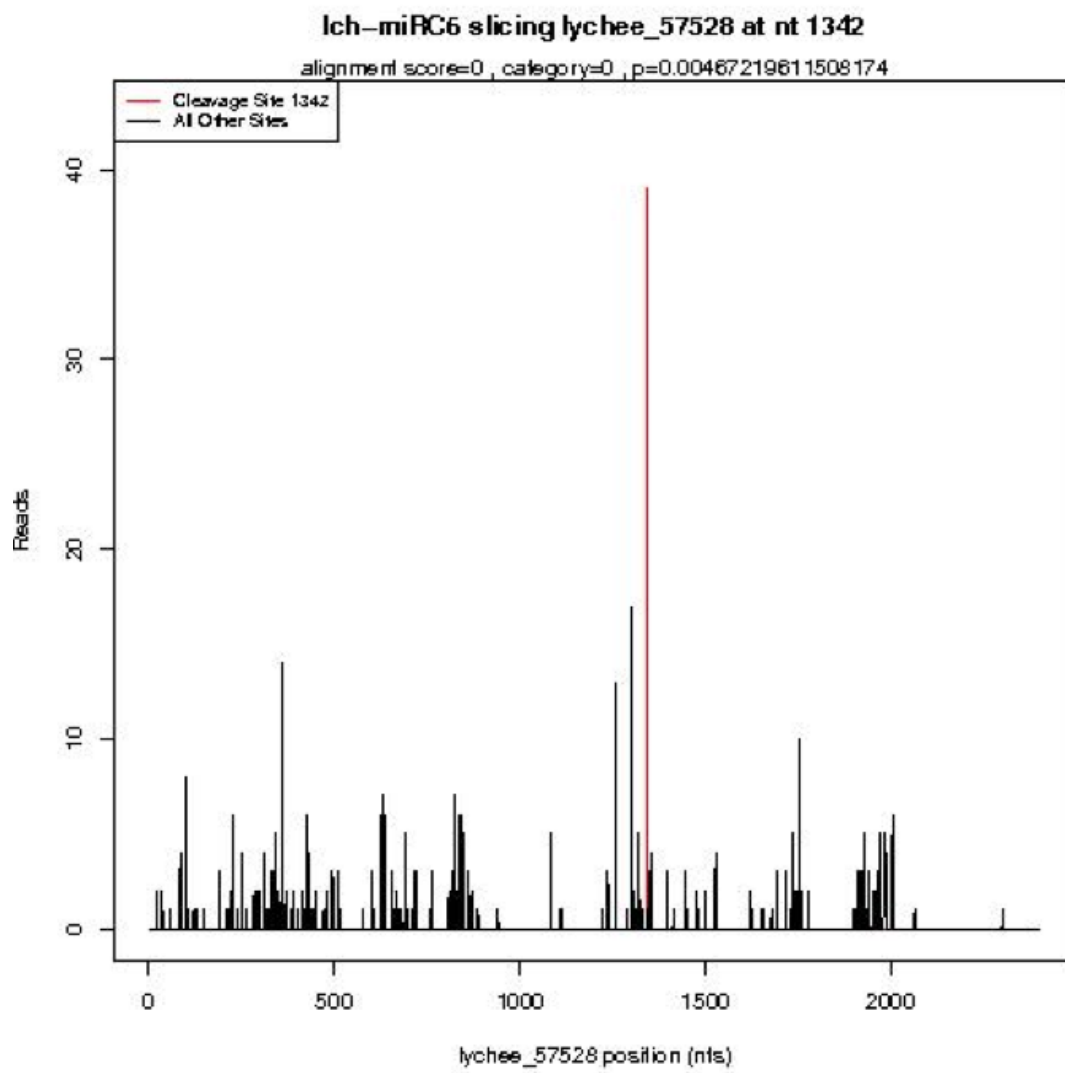

Supplement: 12870_2015_509_MOESM6_ESM.pdf [file 12870_2015_509_MOESM6_ESM.pdf]
